# Supplementary material for: Developing the Network Pain Rehabilitation Limburg: a feasibility study protocol
Source: PubMed Central journal article supplement — BMJ Open. 2019 Jun 27;9(6):e025962. doi: 10.1136/bmjopen-2018-025962 (PMC6597742; doi:10.1136/bmjopen-2018-025962), 2019-06-27
Supplement: bmjopen-2018-025962.draft_revisions.pdf [file bmjopen-2018-025962.draft_revisions.pdf]

# BMJ Open

BMJ Open is committed to open peer review. As part of this commitment we make the peer review history of every article we publish publicly available.

When an article is published we post the peer reviewers' comments and the authors' responses online. We also post the versions of the paper that were used during peer review. These are the versions that the peer review comments apply to.

The versions of the paper that follow are the versions that were submitted during the peer review process. They are not the versions of record or the final published versions. They should not be cited or distributed as the published version of this manuscript.

BMJ Open is an open access journal and the full, final, typeset and author-corrected version of record of the manuscript is available on our site with no access controls, subscription charges or pay-per-view fees (<http://bmjopen.bmj.com>).

If you have any questions on BMJ Open's open peer review process please email [info.bmjopen@bmj.com](mailto:info.bmjopen@bmj.com)

# BMJ Open

## Developing the Network Pain Rehabilitation Limburg: a feasibility study protocol

|                               |                                                                                                                                                                                                                                                                                                                                                                                                                                                                                                                                                                                                                                                                                                                                                                                                                                      |
|-------------------------------|--------------------------------------------------------------------------------------------------------------------------------------------------------------------------------------------------------------------------------------------------------------------------------------------------------------------------------------------------------------------------------------------------------------------------------------------------------------------------------------------------------------------------------------------------------------------------------------------------------------------------------------------------------------------------------------------------------------------------------------------------------------------------------------------------------------------------------------|
| Journal:                      | <i>BMJ Open</i>                                                                                                                                                                                                                                                                                                                                                                                                                                                                                                                                                                                                                                                                                                                                                                                                                      |
| Manuscript ID                 | bmjopen-2018-025962                                                                                                                                                                                                                                                                                                                                                                                                                                                                                                                                                                                                                                                                                                                                                                                                                  |
| Article Type:                 | Protocol                                                                                                                                                                                                                                                                                                                                                                                                                                                                                                                                                                                                                                                                                                                                                                                                                             |
| Date Submitted by the Author: | 10-Aug-2018                                                                                                                                                                                                                                                                                                                                                                                                                                                                                                                                                                                                                                                                                                                                                                                                                          |
| Complete List of Authors:     | Lamper, Cynthia; Maastricht University CAPHRI School for Public Health and Primary Care, Department of Rehabilitation Medicine<br>Kroese, Mariëlle; Maastricht University CAPHRI School for Public Health and Primary Care, Department of Health Services Research<br>Köke, Albère; Maastricht University CAPHRI School for Public Health and Primary Care, Department of Rehabilitation Medicine; Adelante<br>Ruwaard, Dirk; Maastricht University CAPHRI School for Public Health and Primary Care, Department of Health Services Research<br>Verbunt, Jeanine; Maastricht University CAPHRI School for Public Health and Primary Care, Department of Rehabilitation Medicine; Adelante<br>Huijnen, Ivan ; Maastricht University CAPHRI School for Public Health and Primary Care, Department of Rehabilitation Medicine; Adelante |
| Keywords:                     | REHABILITATION MEDICINE, HEALTH SERVICES ADMINISTRATION & MANAGEMENT, Musculoskeletal disorders < ORTHOPAEDIC & TRAUMA SURGERY, PAIN MANAGEMENT, PRIMARY CARE, Organisation of health services < HEALTH SERVICES ADMINISTRATION & MANAGEMENT                                                                                                                                                                                                                                                                                                                                                                                                                                                                                                                                                                                         |
|                               |                                                                                                                                                                                                                                                                                                                                                                                                                                                                                                                                                                                                                                                                                                                                                                                                                                      |

SCHOLARONE™  
Manuscripts

only

## Developing the Network Pain Rehabilitation Limburg: a feasibility study protocol

Cynthia Lamper<sup>1</sup>, Mariëlle EAL Kroese<sup>2</sup>, Albère J Köke<sup>1,3</sup>, Dirk Ruwaard<sup>2</sup>, Jeanine AMCF Verbunt<sup>1,3</sup>, Ivan PJ Huijnen<sup>1,3</sup>

### Corresponding author

Cynthia Lamper  
Universiteitssingel 40,  
6229 ER Maastricht  
P.O. Box 616, 6200 MD Maastricht  
the Netherlands  
[cynthia.lamper@maastrichtuniversity.nl](mailto:cynthia.lamper@maastrichtuniversity.nl)  
+31 (0)43-3882168

### Author affiliations

<sup>1</sup>Department of Rehabilitation Medicine, School for Public Health and Primary Care (CAPHRI), Maastricht University, Faculty of Healthcare, Medicine and Life Sciences, Maastricht, the Netherlands

<sup>2</sup>Department of Health Services Research, School for Public Health and Primary Care (CAPHRI), Faculty of Healthcare, Medicine and Life Sciences, Maastricht University, Maastricht, the Netherlands

<sup>3</sup>Centre of Expertise in Rehabilitation and Audiology, Adelante, Hoensbroek, the Netherlands

Word count, excluding title page, abstract, references, figures, and tables: 3.989

## ARTICLE SUMMARY

### Abstract

Introduction: Patients undergoing rehabilitation care for chronic musculoskeletal pain (CMP) face challenges as mismatches often exist between the patient's actual biopsychosocial profile and the treatment offered. There is still a lack of knowledge regarding recognition, adequate referral, and treatment, and varying points of view about the biopsychosocial profile for patients with CMP, which can result in medical shopping. In order to improve health care for patients with CMP, a transmural network in which different healthcare professionals collaborate in providing effective integrated healthcare will be composed striving to fulfill the Quadruple Aim of healthcare, whereby the improvement of population health, patient's experience of care, and work life for healthcare professionals, as well as a reduction in costs will be taken into account.

Methods and analysis: This feasibility study will examine the barriers and facilitators, perceived added value, and acceptability of the development, implementation, and transferability of the Network Pain Rehabilitation Limburg (NPRL) with a three-phase iterative and incremental design, based on key principles of a user-centred design. Focus groups, interviews, field notes, and questionnaires will be used in which healthcare professionals, as well as patients involved in the NPRL, will participate. The results of each phase will be analysed following the Consolidated Framework for Implementation Research (CFIR) and will be used to refine NPRL in daily practise.

Ethics and dissemination: Informed consent will be obtained from all participants. The results of this feasibility study will form the basis for refinement of NPRL and planning of a large-scale process and effect evaluation of the Quadruple Aim outcomes. Dissemination will include publications and presentations at national and international conferences.

Trial registration number: Medical Ethics Committee Z, the Netherlands, METC 17-N-133

### Keywords

Feasibility, transmural network, integrated care, pain rehabilitation, musculoskeletal pain, Quadruple Aim

### Strengths and limitations of the study

- This study will be the first to evaluate feasibility and acceptability of a transmural network for pain rehabilitation aiming to improve the continuity of care and reduce the number of inadequate referrals and treatments for patients with chronic musculoskeletal pain.
- Focus groups, interviews, field notes, and questionnaires will be used to evaluate the barriers and facilitators, perceived value, and acceptability of Network Pain Rehabilitation Limburg (NPRL).
- The evidence generated from this feasibility study will not only help to adjust the design and content of NPRL, but will also help inform future studies with developing and implementing transmural networks in healthcare.
- Data will be analysed using the Consolidated Framework for Implementation Research by Damschroder et al.
- In the future, a large-scale process and effective evaluation on the Quadruple Aim outcomes will be planned.

## INTRODUCTION

Nineteen percent of adults in Europe suffer from moderate to severe chronic pain with a duration of at least 6 months according to a large-scale epidemiological study.<sup>1</sup> Also, about 18% of adults in the Netherlands have moderate to severe general chronic pain.<sup>2</sup> Almost 90% of individuals with chronic pain had experienced it for over 2 years.<sup>3</sup> The most reported chronic pain complaint was chronic musculoskeletal pain (CMP). CMP is a complex biopsychosocial experience that varies widely between people depending on the context and meaning of the pain and the impact of psychosocial factors on patient's functioning.<sup>4 5</sup>

Breivik *et al*<sup>1</sup> found that people with CMP were less able or even unable to do a range of daily activities and to maintain an independent lifestyle. In addition to pain itself, patients with CMP are often confronted with an elevated level of disability, depression, and anxiety resulting in an increased disease burden.<sup>6-8</sup> In addition, work absenteeism among these patients is very high.<sup>1 9</sup>

<sup>10</sup> In recent years, the direct and indirect costs for CMP patients are estimated at 20 billion Euro's in the Netherlands.<sup>11</sup> These costs are even higher than the annual costs of heart disease, cancer, and diabetes.<sup>12</sup> Although costs for CMP are high, only up to 60-74% of patients with CMP get treated, and only 2-5% get treated by a pain management specialist.<sup>1 2 13</sup>

Currently, regardless treatment as received, 34-79% of Dutch CMP patients still indicate a feeling of inadequate treatment.<sup>2 14</sup> These patients seek a diagnosis or solution to their pain problem, which explains medical shopping. Even 61% of patients that started a multidisciplinary rehabilitation program visited 6 to > 20 different healthcare professionals one year before starting with multidisciplinary rehabilitation program.<sup>15</sup> A potential reason for these inefficiencies might be that the complexity of the patient's pain problem does not match with treatment as delivered, resulting in over or under treatment<sup>16</sup>, which highlights the need for adequate (cost) effective treatment strategies.

This mismatch may be explained by the fact that the knowledge and perspective of healthcare professionals, decision makers, and the public varies regarding CMP, referral, and treatment.<sup>13</sup> Healthcare professionals receive inadequate training on the diagnosis and treatment of CMP, causing different points of view. Some healthcare professionals are more biomedical oriented and focus on explaining and solving the pain, whereas others are more biopsychosocial oriented and focus on optimising functioning despite CMP.<sup>17</sup> Therefore, referral and treatment

1  
2  
3 selections vary among healthcare professionals, which may result in less efficient care for  
4 patients with CMP.  
5  
6  
7

8 Besides the different perspectives regarding CMP, general practitioners (GPs) in primary care  
9 and rehabilitation physicians (RPs) in secondary and tertiary care refer patients mostly based on  
10 their anamnesis and clinical experience. However, it appears to be difficult for GPs to identify  
11 the impact of all psychosocial factors on chronic low back pain patients, one of the most  
12 frequently encountered CMP problems.<sup>18</sup> Recently, different tools became available to support  
13 GPs in the decision-making process concerning (initial) treatment options for patients with  
14 chronic low back pain and fibromyalgia, especially focusing on the impact of psychosocial  
15 components.<sup>19-22</sup> However, these decision-making tools are not implemented in daily care yet in  
16 the Netherlands. In the Dutch health care system, patients with moderate to severe levels of  
17 disability and associated influencing psychosocial factors are seen by a RP. To support decision  
18 making by RPs, an evidence-based objective tool to classify patients objectively and  
19 transparently for a specific treatment is needed. Earlier studies have shown that the interrater  
20 reliability of the method currently used by RPs to classify the level of disability (WPN  
21 classification) is at least questionable.<sup>23 24</sup> In addition, healthcare professionals indicate a lack of  
22 overview regarding the complete supply of treatment methods, resulting in inadequate  
23 referrals.<sup>25</sup>  
24  
25  
26  
27  
28  
29  
30  
31  
32  
33

34  
35 Ideally, after assessing the level of disability, the patient receives a treatment matching the  
36 complexity of the pain problem in line with the biopsychosocial profile. As in most situations, no  
37 cure for CMP is possible and evidence-based treatments are multicomponent pain rehabilitation  
38 with a biopsychosocial focus on being active and living a valuable life despite pain.<sup>5 26-28</sup> In  
39 primary care physiotherapy, cognitive-behavioural interventions and interventions focusing on  
40 biopsychosocial factors have shown long-term effects on patient outcomes.<sup>29 30</sup> Moreover, even  
41 positive effects were found when advice combined with pain education alone is given by GPs or  
42 therapists to patients with CMP.<sup>31-33</sup> In secondary and tertiary care, multidisciplinary pain  
43 rehabilitation programs with physical, psychological, and/or social/work related components, like  
44 Acceptance Commitment Therapy (ACT), Graded Activity (GA), and Exposure in vivo (EXP),  
45 are more effective than treatments focusing on one aspect of the biopsychosocial model for  
46 decreasing pain and disability in patients with disabling chronic low back pain.<sup>34-39</sup>  
47  
48  
49  
50  
51  
52  
53  
54  
55  
56  
57  
58  
59  
60

1  
2  
3 Despite this knowledge of the effective components of multidisciplinary rehabilitation programs,  
4 a wide variety of treatment approaches in various dosages are currently applied in regular  
5 rehabilitation programs in different private and public rehabilitation centres.<sup>40</sup> To overcome the  
6 different points of view as well as the lack of overview about treatment options, objective  
7 decision-making tools, and variety of treatments in the Netherlands, a national care standard for  
8 chronic pain was presented in 2017.<sup>11</sup> In this standard, a stepped and person-centred care  
9 approach for patients with CMP was proposed.  
10  
11  
12  
13  
14  
15

16 To implement care as part of the national care standard, a transmurial network could be  
17 designed in which different healthcare professionals collaborate in providing person-centred  
18 rehabilitation care. Recently, different transmurial integrated care health networks, for example  
19 for Parkinson's disease and palliative care, have been successfully developed and implemented  
20 in the Netherlands.<sup>41 42</sup> In line with these findings, a transmurial pain rehabilitation network can  
21 provide a shared vision regarding CMP, including early recognition of subacute pain patients  
22 followed by suitable person-centred treatment and referral, is supposed to improve patients'  
23 levels of functioning despite pain and to prevent medical shopping of patients with CMP.<sup>11</sup> It  
24 should have an unambiguous view, stepped care, and a person-centred approach with  
25 guidelines for referral and treatment, coordination, and a continuous focus on improvement of  
26 care to increase the effectiveness, quality, and efficiency of healthcare for patients with CMP.<sup>43</sup>  
27 This approach fits with the advice of the World Health Organisation to focus on stimulating  
28 functioning when designing rehabilitation care.<sup>44 45</sup>  
29  
30  
31  
32  
33  
34  
35  
36  
37

38 The Network Pain Rehabilitation Limburg (NPRL), in the province of Limburg, the Netherlands,  
39 will be designed striving to fulfil the Quadruple Aim, in which the improvement of population  
40 health, experience of care by patients, and work life satisfaction for physicians and staff, as well  
41 as a reduction in costs are important aspects to be taken into account.<sup>46 47</sup> Before evaluation the  
42 Quadruple Aim outcomes, as a first step a feasibility study will be performed aiming to explore  
43 the barriers and facilitators of the development, implementation, and transferability of NPRL.  
44 Following the UK Medical Research Council framework<sup>48</sup> for developing complex interventions  
45 will be useful as NPRL is a complex intervention because of the number of practices and  
46 integrated healthcare settings targeted in the NPRL and the number and variability of outcomes.  
47 This paper describes the study protocol of the feasibility study of NPRL for adults with CMP.  
48  
49  
50  
51  
52  
53  
54  
55  
56  
57  
58  
59  
60



## METHODS

### Study design

A feasibility study with an iterative and incremental design, based on key principles of user-centred design<sup>49 50</sup> will be conducted in the South-East region of the Netherlands from October 2017 till October 2018. In this iterative process, the development of NPRL will take place in three phases, namely development, implementation, and transferability. The results of each phase will be used to refine the elements of the intervention and to shape the next phase, in which the barriers and facilitators of the different phases will be evaluated. During meetings, all healthcare professionals involved will be informed about the results and the adjustments to NPRL. In the subsequent phase, new adjustments will be integrated in daily practise. The development and implementation process will be 'practise-focused', indicating that the development will be based on the healthcare professionals' experiences with the current healthcare situation.

In phase 1, exploration of context will take place in order to develop the design of the NPRL and to educate the healthcare professionals involved. The focus will be on the barriers and facilitators in the development process of NPRL. Next, in phase 2 (implementation), the project focus will be on the specification of the content to adjust the design of the NPRL to daily practise. More insight into the barriers and facilitators of the implementation process will be collected. In phase 3 (transferability), the project will focus on the organisation of care in daily practise and the research focus will be on the barriers and facilitators for further implementation in other practices and organisations. In addition, preliminary data on efficiency will be collected. NPRL will be feasible in daily practise if the studied barriers and facilitators from the perspectives of healthcare professionals and patients are translatable to policies or guidelines that can be adjusted and integrated in daily practise.

### Participants

In this transmurial NPRL, healthcare professionals from different disciplines (GPs, physiotherapists, exercise therapists, mental health practice nurses, RPs, and rehabilitation teams) and different healthcare settings (primary, secondary, and tertiary care) will be asked for participation (Figure 1). The setting in primary care concerns general and therapy practices, in secondary care a private outpatient rehabilitation clinic and the outpatient rehabilitation department of a regional hospital, and in tertiary care a specialised rehabilitation clinic. The

quality criteria established for practices and organisations for enrolling in NPRL are described in Table 1.

| Inclusion                                                                                                                                                                                                                       | Exclusion                                                                                                                            |
|---------------------------------------------------------------------------------------------------------------------------------------------------------------------------------------------------------------------------------|--------------------------------------------------------------------------------------------------------------------------------------|
| Having a practice in the pilot area of NPRL.                                                                                                                                                                                    | A GP who has visited less than 2 out of 3 education days or a therapist who has participated in less than 3 out of 4 education days. |
| Willingness to attend the meetings and to implement the different elements of NPRL.                                                                                                                                             | Are not able to implement the protocols or assessment tool of NPRL in their own practice.                                            |
| GPs and mental health practice nurses must be linked to a participating therapist in order to make effective referrals to treat patients in (interdisciplinary) primary care regarding the protocol and vision of NPRL.         |                                                                                                                                      |
| Physiotherapists having a participating GP or RP. As they cannot refer a patient when the patient is too complex for them, they will not have an inclusion option for study participants if there is no participating GP or RP. |                                                                                                                                      |
| Secondary and tertiary organisations have to meet the criteria of the Position Paper 'Medical Specialist Rehabilitation for chronic musculoskeletal pain' [2017] <sup>57</sup> .                                                |                                                                                                                                      |

NPRL = Network Pain Rehabilitation Limburg; GP = general practitioner; RP = rehabilitation physician

In primary care, the recruitment will start with a primary care therapist or a GP interested in pain, and after consent to participate in NPRL. This person will be asked to recruit a GP or therapist with whom they already have intensive collaboration. For secondary and tertiary care, main organisations in the region providing rehabilitation care for patients with CMP will be asked to participate, so all healthcare settings in this region will be covered. Because of the nature and aim of this feasibility study, we decided to keep the number of healthcare professionals restricted. Based on earlier research, it has to be expected that in this situation the implementation process in daily practise can be easily adjusted when barriers arise.<sup>42</sup>

In addition to the involvement of healthcare professionals in this study, all patients treated by the participating healthcare professionals will be asked to evaluate NPRL and the perceived quality of care. The inclusion criteria for patients to participate in this study are described in Table 2.

Table 2: Inclusion criteria for patients in this feasibility study

| Inclusion                                                                | Exclusion                                                                                                                                                                                           |
|--------------------------------------------------------------------------|-----------------------------------------------------------------------------------------------------------------------------------------------------------------------------------------------------|
| Age ≥ 18 years old at the start of the study.                            | Any suspicion of a medical (orthopaedic, rheumatic, or neurological) disease that can explain the current pain (e.g. rheumatism or hernia) complaints or that can be treated by sufficient therapy. |
| Patient living in the pilot area (physiotherapist, GP, or RP) of NPRL.   |                                                                                                                                                                                                     |
| Having musculoskeletal pain that is (suspected to be) chronic.           | Any suspicion of a (underlying) psychiatric disease, for which psychiatric treatment is better suited, according to the expert opinion of the GP and RP.                                            |
| Treatment aim of the patient is to improve functioning despite the pain. | Pregnancy.                                                                                                                                                                                          |
| Adequate Dutch literacy to complete the assessments.                     |                                                                                                                                                                                                     |

NPRL = Network Pain Rehabilitation Limburg; GP = general practitioner; RP = rehabilitation physician

It is expected that approximately 100 patients from all participating healthcare settings will give informed consent during the course of this study. They will receive questionnaires regarding satisfaction with care and their health status and pain related disability. Moreover, a sample of approximately 10 patients, who finished a treatment according to the protocol of NPRL, will be recruited for a focus group in which more information about barriers and facilitators from a patient perspective will be collected.

### **Intervention: Network Pain Rehabilitation Limburg**

The main aim of NPRL is to provide integrated care for patients with CMP in order to improve their level of functioning despite pain by stimulating a biopsychosocial approach for all involved healthcare professionals. This should accomplish the Quadruple Aim: improvement of CMP patient functioning, experiences of care, and work life satisfaction of physicians and staff, as well as a reduction of healthcare costs of patients with CMP.

Each patient will receive the treatment needed to reach his/her optimal level of functioning. In order to reach this, a stepped care approach will be used for every individual patient. Depending on the level of disability and biopsychosocial factors involved, this will either include education only and no further treatment, monodisciplinary treatment in primary care, interdisciplinary treatment in primary care (collaboration between GPs, primary care therapists, and mental health practice nurses in assessing and treating patients with CMP who need mental support

1  
2  
3 besides physical exercise) or multidisciplinary treatment in secondary or tertiary care.  
4 Collaboration will be supported by facilitating communication between patients and all  
5 healthcare professionals involved in the trajectory of an individual patient by E-health.<sup>51</sup> In  
6 addition, the collaboration between healthcare professionals in different practices and  
7 organisations will be further supported by informative meetings and education days.  
8  
9  
10

11  
12 In order to facilitate the joint focus on improving the level of functioning despite pain, the  
13 following elements are integrated in NPRL:  
14  
15

16  
17 *Integral focus on assessment and referral: assessment tools*  
18

19 To support the healthcare professionals in their decision making for problem mapping and  
20 treatment selection, two evidence-based objective assessment tools will support the  
21 assessment of complexity of the pain problem; one tool for GPs and primary care therapists and  
22 one tool for RPs. The assessment tool for primary care is based on the Start Back Tool<sup>20</sup> and  
23 will help to advise patient treatment matched to the patient's biopsychosocial profile. The  
24 options are: advice only, treatments in primary care, or for decision making by a RP (Figure 2).  
25 The GP can also decide to advise patients for a treatment outside NPRL (psychiatrist, specific  
26 healthcare specialist, etc.). Since 2006, patients in the Netherlands can visit a primary care  
27 therapist without a referral of a GP,<sup>52</sup> so these therapists will also use this assessment tool. In  
28 this situation, a primary care therapist of NPRL will advise the patient to visit the GP for  
29 additional assessment and referral if needed as the GP is the gatekeeper to secondary and  
30 tertiary care.  
31  
32  
33  
34  
35  
36  
37  
38

39 When a patient visits a RP, the assessment tool for specialised rehabilitation care is used for  
40 decision making. This tool will assess the patient's view as well as the RP's view of the  
41 biopsychosocial problem and consists of two parts. The first part will guide the anamnesis of the  
42 RP and is based on two different ways to score disability related complexity, namely the Case  
43 Complexity Index and INTERMED method.<sup>24 53 54</sup> First, a standardised scoring method for  
44 assessing the biopsychosocial profile and care for the past and current situations will be used  
45 by the RP. Second, a set of CMP related questionnaires assessing anxiety, depression,  
46 catastrophising, fatigue, pain level, participation level, and general health will be completed by  
47 the patient. After completion of these questionnaires, scores will be interpreted by the RP.  
48 Based on scoring in both parts of the RP-assessment tool, patients will be categorised by  
49 profile, representing the patient's level of disability. In addition to primary and interdisciplinary  
50  
51  
52  
53  
54  
55  
56  
57  
58  
59  
60

1  
2  
3 primary care, the second tool will assist the RP to further differentiate between available  
4 secondary or tertiary multidisciplinary rehabilitation programs (Figure 2).  
5  
6  
7

#### 8 *Integral focus on treatment content and duration: treatment protocols*

9 When the patient receives treatment, an individualised treatment plan based on their current  
10 needs will be made. Protocols will be based on the most recent evidence-based treatment  
11 methods such as GA, EXP, and ACT<sup>34-37 39</sup> and these will be used in all healthcare settings. As  
12 these evidence-based methods are developed for secondary and tertiary care, they will be  
13 adjusted for primary care. During evaluations in phase 1 and 2, healthcare professionals will be  
14 invited to provide feedback on the treatment protocols. As a result, adjustments to the content  
15 and duration of treatment protocols will be made if these adjustments are in line with the  
16 evidence-based treatment methods.  
17  
18  
19  
20  
21  
22  
23

#### 24 *Integral focus on self-management: E-health application*

25 All professionals and patients participating in the NPRL will make use of an E-health application:  
26 SanaCoach Pain Rehabilitation.<sup>51</sup> Also, primary care patients who receive 'advice only' can  
27 make use of this SanaCoach Pain Rehabilitation. The coach has different functions and goals in  
28 the treatment process. The primary goal is to support self-management. The main function of  
29 the coach is to provide pain education based on the education modules. Different eLearning  
30 modules are developed for the patients in order to teach them about the biopsychosocial  
31 aspects of pain. Furthermore, diaries are integrated into the coach in which patients can give  
32 feedback on changes in pain intensity, level of activity over time, and the interrelation between  
33 these variables. Moreover, healthcare professionals can use scores from these diaries to adjust  
34 treatment to individual patients. The coach also consists of a chat function between the patient  
35 and healthcare professionals to ensure short communication lines. All healthcare professionals  
36 involved in the care process of a patient have access to this chat function with that patient.  
37 Additionally, the assessment tool for primary care is integrated, which makes these results  
38 available for all involved healthcare professionals. For this study, the questionnaires for patients  
39 are also available via the coach. Based on the level of complexity of disability, the functions in  
40 the SanaCoach Pain Rehabilitation will be adjusted to the patient, such as the number of diaries  
41 and level of education.  
42  
43  
44  
45  
46  
47  
48  
49  
50  
51  
52  
53

#### 54 **Data collection**

55  
56  
57  
58  
59  
60

In this study, the feasibility of the development, implementation, and transferability of NPRL for adults with CMP will be investigated. Therefore, different data collection techniques such as observations, interviews, focus groups, and questionnaires will be combined to get more insight into the barriers and facilitators of NPRL (Table 3).

| Phase                                             | 1                                                                                                                                                                                                                                                                                                                                                                                                                                                                                                                                                                                                                 | 2                                                                                                                                                                                                                                                                                                                                                  | 3                                                                                                                                                                                                                                                                                                                                                                                                                                                                                                                                                                                                                                                                                                                                                                                                                    |
|---------------------------------------------------|-------------------------------------------------------------------------------------------------------------------------------------------------------------------------------------------------------------------------------------------------------------------------------------------------------------------------------------------------------------------------------------------------------------------------------------------------------------------------------------------------------------------------------------------------------------------------------------------------------------------|----------------------------------------------------------------------------------------------------------------------------------------------------------------------------------------------------------------------------------------------------------------------------------------------------------------------------------------------------|----------------------------------------------------------------------------------------------------------------------------------------------------------------------------------------------------------------------------------------------------------------------------------------------------------------------------------------------------------------------------------------------------------------------------------------------------------------------------------------------------------------------------------------------------------------------------------------------------------------------------------------------------------------------------------------------------------------------------------------------------------------------------------------------------------------------|
| Time period                                       | October 2017–February 2018                                                                                                                                                                                                                                                                                                                                                                                                                                                                                                                                                                                        | February 2018–June 2018                                                                                                                                                                                                                                                                                                                            | June 2018–October 2018                                                                                                                                                                                                                                                                                                                                                                                                                                                                                                                                                                                                                                                                                                                                                                                               |
| Goal project                                      | Exploration of context will take place in order to develop the design of the NPRL and to educate the involved healthcare professionals.                                                                                                                                                                                                                                                                                                                                                                                                                                                                           | Specification of the content to adjust the design of the transmurals network to daily practise.                                                                                                                                                                                                                                                    | Organisation of care in daily practise and barriers and facilitators for implementation in other practices and organisations.                                                                                                                                                                                                                                                                                                                                                                                                                                                                                                                                                                                                                                                                                        |
| Goal evaluation                                   | Insight into the barriers and facilitators of the development of NPRL.                                                                                                                                                                                                                                                                                                                                                                                                                                                                                                                                            | Insight into the barriers and facilitators of the implementation of NPRL.                                                                                                                                                                                                                                                                          | Insight into the barriers and facilitators of the transferability of NPRL.                                                                                                                                                                                                                                                                                                                                                                                                                                                                                                                                                                                                                                                                                                                                           |
| Data collection method, respondents, and outcomes | <p><u>Focus groups and interviews</u><br/><i>Healthcare professionals</i></p> <ul style="list-style-type: none"> <li>Experiences with the informative meetings</li> <li>Experiences with the education days</li> <li>Expectations and views on working in NPRL</li> <li>Current experiences (satisfaction) with working in NPRL</li> <li>Barriers and facilitators</li> </ul> <p><u>Questionnaire</u><br/><i>Healthcare professionals</i></p> <ul style="list-style-type: none"> <li>Current views and thoughts regarding patients with CMP</li> <li>Referral pattern</li> <li>Patient characteristics</li> </ul> | <p><u>Focus groups and interviews</u><br/><i>Healthcare professionals</i></p> <ul style="list-style-type: none"> <li>Views on working in NPRL</li> <li>Current experiences (satisfaction) with working in NPRL</li> <li>Implications and recommendations of the implementation strategy for practise</li> <li>Barriers and facilitators</li> </ul> | <p><u>Focus groups and interviews</u><br/><i>Healthcare professionals</i></p> <ul style="list-style-type: none"> <li>Current experiences (satisfaction) with working in NPRL</li> <li>Implications and recommendations of the implementation strategy for practise</li> <li>Implications and recommendations for future research and project</li> <li>Satisfaction with NPRL and with work life</li> <li>Barriers and facilitators</li> </ul> <p><u>Focus group</u><br/><i>+/- 10 patients</i></p> <ul style="list-style-type: none"> <li>Perceived quality of care</li> <li>Experiences with NPRL</li> <li>Barriers and facilitators</li> </ul> <p><u>Questionnaire</u><br/><i>Healthcare professionals</i></p> <ul style="list-style-type: none"> <li>Referral pattern</li> <li>Patient characteristics</li> </ul> |
|                                                   | <p><u>Questionnaire start and end of treatment (T0 and T2)</u><br/><i>Patients</i></p> <ul style="list-style-type: none"> <li>Health status</li> </ul>                                                                                                                                                                                                                                                                                                                                                                                                                                                            |                                                                                                                                                                                                                                                                                                                                                    |                                                                                                                                                                                                                                                                                                                                                                                                                                                                                                                                                                                                                                                                                                                                                                                                                      |

- Quality of care
- Usability of the SanaCoach Pain Rehabilitation

#### Questionnaire after referral (T1)

##### *Patients*

- Quality and satisfaction with referral and care

#### Questionnaire or logbook of treatment

##### *Healthcare specialists*

- Barriers and facilitators of the treatment protocol per patient

#### Notes

- Current views regarding NPRL
- Barriers and facilitators

NPRL = Network Pain Rehabilitation Limburg; CMP= chronic musculoskeletal pain

During the informative meetings and education days, field notes will be made in order to collect information about the views on NPRL and its elements out of the perspectives of the healthcare professionals involved. At the end of each phase, focus groups and/or interviews will take place with (a selection of) the healthcare professionals involved. During the evaluation of phase 1, healthcare professionals will be asked about the barriers and facilitators they perceived while working in NPRL. Therefore, more information will be collected about expectations, views, experiences, and satisfaction. Also, experiences and opinions about the informative meetings and education days will be collected. Healthcare professionals will fill in an electronic questionnaire in phase 1 concerning decision making, treatments, and characteristics of the patients involved in the study. This information will give more insight into potential changes in referral policy between the situation in usual care and the situation within NPRL. Moreover, the questionnaire also asks for knowledge and perspectives regarding patients with CMP.

In phases 2 and 3, more emphasis will be put on the added value of NPRL including barriers and facilitators for implementation. This information will be used for recommendations for practise and future research. Also in these phases, information will be gained about the experiences and satisfaction with NPRL during a focus group with healthcare professionals. Moreover, in phase 3 (transferability), they will fill in an electronic questionnaire concerning decision making, treatments, and characteristics of the patients involved in the study. As part of the evaluation of phase 3, a focus group with a sample of 6 to 10 patients with CMP who are being treated by participating healthcare professionals will take place. During this focus group,



1  
2  
3 the emphasis will be on the satisfaction of care and experiences, leading to barriers and  
4 facilitators with NPRL.  
5  
6  
7

8 Besides this information, the research team will keep up a logbook to get insight into the barriers  
9 and facilitators of NPRL. The field notes in this logbook will be the results of discussions with  
10 different healthcare professionals, patients, and stakeholders, as well as researchers.  
11 Additionally, patients will be asked to complete study-related questionnaires about the quality  
12 and their satisfaction with the decision making, treatment and education, and usability of the  
13 SanaCoach Pain Rehabilitation in order to further improve different elements of NPRL. Besides  
14 this feasibility data, also some questions about their work status, general health, and  
15 participation level will be asked as preliminary data on efficiency to objectify the progress of the  
16 treatment. They will receive this questionnaire at the start of the treatment (T0) and at the end of  
17 the treatment (T2). Patients referred to another healthcare professional will receive an extra  
18 questionnaire after the referral (T1) regarding the quality of and satisfaction with the decision  
19 making. Additionally, after completion of the treatment, a small questionnaire or logbook about  
20 the treatment of each patient separately must be handed in by the healthcare professionals.  
21 This information will be used to discover barriers and facilitators and desired adjustments of the  
22 treatment protocols.  
23  
24  
25  
26  
27  
28  
29  
30  
31  
32

### 33 **Data Analysis**

34 The Consolidated Framework for Implementation Research (CFIR) protocol according to  
35 Damschroder *et al*<sup>55</sup> will be used to develop this feasibility evaluation and analysis plan. This  
36 explanatory framework with theory-based constructs and mechanisms will be used to help  
37 explain whether an implementation may or may not succeed and to identify barriers and  
38 facilitators. In this iterative design, the results of each phase will be used to adapt the  
39 intervention for the next phase.  
40  
41  
42  
43  
44  
45

46 All field notes and logbooks will be collected. Additionally, the focus groups and interviews will  
47 be audio recorded and transcribed verbatim. Qualitative data will be analysed using the NVivo  
48 software (NVivo.version 11.1.0.411) following a directed content analysis method.<sup>56</sup> The  
49 analysis will be deductive (e.g. the identified themes will derive from existing theory). After  
50 familiarisation with the data, definitions for the CFIR constructs will be made based on the  
51 intervention in collaboration with the project team. Next, the different constructs will be assigned  
52 to the fewest codes possible. After developing analytic summaries and matrices, the data will be  
53  
54  
55  
56  
57  
58  
59  
60



1  
2  
3 compared to derive barriers and facilitators. A researcher with expertise in qualitative research  
4 without any involvement in the project will peer review the analysis by verification of the analysis  
5 of 20% of the interviews and focus groups. Also, a cross-check for interim findings with  
6 respondents will be performed.  
7  
8  
9

10  
11 Quantitative data will be analysed concurrently with the qualitative data. Descriptive statistics  
12 will be denoted as mean (standard deviation) or median (range) and number (%) for continuous  
13 and categorical data, respectively, with the use of IBM SPSS Statistics 24.  
14  
15

### 16 17 **ETHICS AND DISSIMINATION**

18 Informed consent will be obtained from all participants. Ethical approval for this study was  
19 granted by the Medical Ethics Committee Z, the Netherlands, METC 17-N-133. The results of  
20 this feasibility study will form the base for refinement of NPRL and planning of a large-scale  
21 process and effect evaluation on the Quadruple Aim outcomes. Dissemination will include  
22 publications and presentations at national and international conferences.  
23  
24  
25  
26  
27

### 28 29 **DISCUSSION**

30 This study will provide insight into the feasibility of NPRL, a transmural integrated healthcare  
31 network for CMP rehabilitation. The aim is to provide integrated care for patients with CMP in  
32 order to improve their level of functioning despite pain by stimulating a biopsychosocial  
33 approach for all involved healthcare professionals. It is expected that the study will provide  
34 information on barriers and facilitators, perceived value, acceptability, and implementation  
35 strategies for the development, implementation, and transferability for further develop and  
36 refinement of the NPRL. If the study results suggest that NPRL is feasible and preliminary  
37 outcomes are positive, a large-scale process and effective evaluation of the Quadruple Aim  
38 outcomes will be performed.  
39  
40  
41  
42  
43  
44  
45

46 The process of developing NPRL is in accordance with the Medical Research Council guidance  
47 on how to develop and evaluate complex interventions.<sup>48</sup> In the development process, existing  
48 evidence together with collected evidence based on the expertise of healthcare professionals  
49 was combined to develop the first version of NPRL. This first version of NPRL will be  
50 implemented on a restricted scale to test the feasibility. The evidence generated from this  
51 feasibility study will not only help to adjust the design and content of NPRL but will also inform  
52 future methodological studies on developing and implementing a transmural network in  
53  
54  
55  
56  
57  
58  
59

1  
2  
3 healthcare. It is expected that this bottom-up development in combination with the limited  
4 number of participating healthcare professionals will lead to a successful implementation of the  
5 network. Nijkrake *et al*<sup>42</sup> did indicate this approach as one of the success factors of  
6  
7 ParkinsonNet, a successful and cost-effective network in the Netherlands for patients with  
8  
9 Parkinson's disease.  
10

11  
12 In conclusion, there is need for a transmural network in which different healthcare professionals  
13 collaborate in providing integrated healthcare for patients with CMP. The aim of NPRL is to  
14 improve the level of functioning of individual patients despite pain, experience of care by  
15 patients, and work life satisfaction for physicians and staff, as well as a reduction in costs.  
16  
17 Therefore, this feasibility study will be conducted to explore the barriers and facilitators of the  
18 development, implementation, and transferability of NPRL. The results will be applied to refine a  
19 large-scale process and effective evaluation of the Quadruple Aim outcomes.  
20  
21  
22  
23  
24

## 25 REFERENCES

- 26  
27  
28 1. Breivik H, Collett B, Ventafridda V, et al. Survey of chronic pain in Europe: prevalence, impact  
29 on daily life, and treatment. *Eur J Pain* 2006;10(4):287-333. doi:  
30 10.1016/j.ejpain.2005.06.009
- 31 2. Bekkering GE, Bala MM, Reid K, et al. Epidemiology of chronic pain and its treatment in The  
32 Netherlands. *Neth J Med* 2011;69(3):141-53.
- 33 3. Breivik H, Eisenberg E, O'Brien T, et al. The individual and societal burden of chronic pain in  
34 Europe: the case for strategic prioritisation and action to improve knowledge and  
35 availability of appropriate care. *BMC Public Health* 2013;13:1229. doi: 10.1186/1471-  
36 2458-13-1229
- 37 4. Bushnell MC, Ceko M, Low LA. Cognitive and emotional control of pain and its disruption in  
38 chronic pain. *Nat Rev Neurosci* 2013;14(7):502-11. doi: 10.1038/nrn3516
- 39 5. Gatchel RJ, Peng YB, Peters ML, et al. The biopsychosocial approach to chronic pain:  
40 scientific advances and future directions. *Psychol Bull* 2007;133(4):581-624. doi:  
41 10.1037/0033-2909.133.4.581
- 42 6. Jackson T, Wang Y, Wang Y, et al. Self-efficacy and chronic pain outcomes: a meta-analytic  
43 review. *J Pain* 2014;15(8):800-14. doi: 10.1016/j.jpain.2014.05.002
- 44 7. Lerman SF, Rudich Z, Brill S, et al. Longitudinal associations between depression, anxiety,  
45 pain, and pain-related disability in chronic pain patients. *Psychosom Med*  
46 2015;77(3):333-41. doi: 10.1097/PSY.0000000000000158
- 47 8. Roy R, Thomas M, Matas M. Chronic pain and depression: a review. *Compr Psychiatry*  
48 1984;25(1):96-105.
- 49 9. Borghouts J, Janssen H, Koes B, et al. The management of chronic neck pain in general  
50 practice. A retrospective study. *Scand J Prim Health Care* 1999;17(4):215-20.
- 51 10. Huisstede BM, Wijnhoven HA, Bierma-Zeinstra SM, et al. Prevalence and characteristics of  
52 complaints of the arm, neck, and/or shoulder (CANS) in the open population. *Clin J Pain*  
53 2008;24(3):253-9. doi: 10.1097/AJP.0b013e318160a8b4  
54  
55  
56  
57  
58  
59  
60

11. Zorgstandaard Chronische Pijn 2017 [Available from: [http://www.dutchpainsociety.nl/files/ZorgStandaard\\_Chronische\\_Pijn\\_versie\\_2017\\_03\\_28.pdf](http://www.dutchpainsociety.nl/files/ZorgStandaard_Chronische_Pijn_versie_2017_03_28.pdf) accessed 23/07/2018].
12. Rijksinstituut voor Volksgezondheid en Milieu. 2018 [Available from: <https://www.volksgezondheidenzorg.info/> accessed 19/07/2018].
13. Niv D, Devor M, European Federation of IC. Position paper of the European Federation of IASP Chapters (EFIC) on the subject of pain management. *Eur J Pain* 2007;11(5):487-9. doi: 10.1016/j.ejpain.2007.03.005 [published Online First: 2007/04/17]
14. Krol M, de Boer D, Plass A, et al. CQ-index module Pijn: meetinstrumentontwikkeling. Utrecht: NIVEL 2013.
15. Köke AJA, van Baalen B, Remerie SC, et al. Eindrapportage Revalidatie Nederland. Implementatie en uitbreiding Nederlandse Dataset Pijnrevalidatie. Hoensbroek: Adelante Kenniscentrum, 2012.
16. Peerenboom PBG, Spek J. Medisch Specialistische Revalidatie; Aanspraak en praktijk. Elst, The Netherlands: Tangram Zorgadviseurs, 2013.
17. Froud R, Patterson S, Eldridge S, et al. A systematic review and meta-synthesis of the impact of low back pain on people's lives. *BMC Musculoskelet Disord* 2014;15:50. doi: 10.1186/1471-2474-15-50
18. Jellema P, van der Windt DA, van der Horst HE, et al. Why is a treatment aimed at psychosocial factors not effective in patients with (sub)acute low back pain? *Pain* 2005;118(3):350-9. doi: 10.1016/j.pain.2005.09.002
19. Hill JC, Dunn KM, Lewis M, et al. A primary care back pain screening tool: identifying patient subgroups for initial treatment. *Arthritis Rheum* 2008;59(5):632-41. doi: 10.1002/art.23563 [published Online First: 2008/04/29]
20. Hill JC, Whitehurst DG, Lewis M, et al. Comparison of stratified primary care management for low back pain with current best practice (STarT Back): a randomised controlled trial. *Lancet* 2011;378(9802):1560-71. doi: 10.1016/s0140-6736(11)60937-9 [published Online First: 2011/10/04]
21. Linton SJ, Boersma K. Early identification of patients at risk of developing a persistent back problem: the predictive validity of the Orebro Musculoskeletal Pain Questionnaire. *Clin J Pain* 2003;19(2):80-6. [published Online First: 2003/03/05]
22. van Eijk-Hustings Y, Kroese M, Bessems-Beks M, et al. Supporting healthcare professionals systematically to improve the quality and person-centeredness of fibromyalgia management in primary healthcare. *2012* 2012;2(4):8. doi: 10.5750/ijpcm.v2i4.297 [published Online First: 2012-12-06]
23. Boonstra AM, Schiphorst Preuper HR, Brouwer M, et al. Classificatie van patiënten met chronische pijnklachten; onderzoek naar de betrouwbaarheid van de WPN niveaus. *Nederlandstalig Tijdschrift Pijnbestrijding* 2011; 30(46).
24. Waterschoot FP, Bennen E, van der Woude LH, et al. Case complexity in patients with chronic nonspecific musculoskeletal pain: a Delphi and feasibility study. *Int J Rehabil Res* 2016;39(1):48-56. doi: 10.1097/MRR.000000000000144
25. van Tulder M, Becker A, Bekkering T, et al. Chapter 3. European guidelines for the management of acute nonspecific low back pain in primary care. *Eur Spine J* 2006;15 Suppl 2:S169-91. doi: 10.1007/s00586-006-1071-2
26. Johnson RE, Jones GT, Wiles NJ, et al. Active exercise, education, and cognitive behavioral therapy for persistent disabling low back pain: a randomized controlled trial. *Spine* 2007;32(15):1578-85. doi: 10.1097/BRS.0b013e318074f890
27. Lamb SE, Hansen Z, Lall R, et al. Group cognitive behavioural treatment for low-back pain in primary care: a randomised controlled trial and cost-effectiveness analysis. *Lancet* 2010;375(9718):916-23. doi: 10.1016/S0140-6736(09)62164-4

- 1
  - 2
  - 3
  - 4
  - 5
  - 6
  - 7
  - 8
  - 9
  - 10
  - 11
  - 12
  - 13
  - 14
  - 15
  - 16
  - 17
  - 18
  - 19
  - 20
  - 21
  - 22
  - 23
  - 24
  - 25
  - 26
  - 27
  - 28
  - 29
  - 30
  - 31
  - 32
  - 33
  - 34
  - 35
  - 36
  - 37
  - 38
  - 39
  - 40
  - 41
  - 42
  - 43
  - 44
  - 45
  - 46
  - 47
  - 48
  - 49
  - 50
  - 51
  - 52
  - 53
  - 54
  - 55
  - 56
  - 57
  - 58
  - 59
  - 60
28. Vibe Fersum K, O'Sullivan P, Skouen JS, et al. Efficacy of classification-based cognitive functional therapy in patients with non-specific chronic low back pain: a randomized controlled trial. *Eur J Pain* 2013;17(6):916-28. doi: 10.1002/j.1532-2149.2012.00252.x
29. Hall A, Richmond H, Copsey B, et al. Physiotherapist-delivered cognitive-behavioural interventions are effective for low back pain, but can they be replicated in clinical practice? A systematic review. *Disabil Rehabil* 2018;40(1):1-9. doi: 10.1080/09638288.2016.1236155 [published Online First: 2016/11/23]
30. van Erp RMA. Back on Track: Chronic Low Back Pain Rehabilitation in Primary Care [PhD thesis]. Maastricht University, 2017.
31. Brage K, Ris I, Falla D, et al. Pain education combined with neck- and aerobic training is more effective at relieving chronic neck pain than pain education alone--A preliminary randomized controlled trial. *Man Ther* 2015;20(5):686-93. doi: 10.1016/j.math.2015.06.003
32. Geneen LJ, Martin DJ, Adams N, et al. Effects of education to facilitate knowledge about chronic pain for adults: a systematic review with meta-analysis. *Syst Rev* 2015;4:132. doi: 10.1186/s13643-015-0120-5
33. Louw A, Diener I, Butler DS, et al. The effect of neuroscience education on pain, disability, anxiety, and stress in chronic musculoskeletal pain. *Arch Phys Med Rehabil* 2011;92(12):2041-56. doi: 10.1016/j.apmr.2011.07.198
34. Hayes SC. Acceptance and Commitment Therapy, Relational Frame Theory, and the Third Wave of Behavioral and Cognitive Therapies - Republished Article. *Behav Ther* 2016;47(6):869-85. doi: 10.1016/j.beth.2016.11.006
35. Kamper SJ, Apeldoorn AT, Chiarotto A, et al. Multidisciplinary biopsychosocial rehabilitation for chronic low back pain: Cochrane systematic review and meta-analysis. *BMJ* 2015;350:h444. doi: 10.1136/bmj.h444
36. Lindstrom I, Ohlund C, Eek C, et al. The effect of graded activity on patients with subacute low back pain: a randomized prospective clinical study with an operant-conditioning behavioral approach. *Phys Ther* 1992;72(4):279-90; discussion 91-3.
37. Mansell G, Hall A, Toomey E. Behaviour change and self-management interventions in persistent low back pain. *Best Pract Res Clin Rheumatol* 2016;30(6):994-1002. doi: 10.1016/j.berh.2017.07.004 [published Online First: 2017/11/07]
38. Nicholl BI, Sandal LF, Stockkendahl MJ, et al. Digital Support Interventions for the Self-Management of Low Back Pain: A Systematic Review. *J Med Internet Res* 2017;19(5):e179. doi: 10.2196/jmir.7290 [published Online First: 2017/05/28]
39. Vlaeyen JW, Kole-Snijders AM, Boeren RG, et al. Fear of movement/(re)injury in chronic low back pain and its relation to behavioral performance. *Pain* 1995;62(3):363-72.
40. Regieraad Kwaliteit van Zorg. Chronische pijn. Den Haag, 2011.
41. Haarsma F, Moser A, Beckers M, et al. The perceived impact of public involvement in palliative care in a provincial palliative care network in the Netherlands: a qualitative study. *Health Expect* 2015;18(6):3186-200. doi: 10.1111/hex.12308
42. Nijkrake MJ, Keus SH, Overeem S, et al. The ParkinsonNet concept: development, implementation and initial experience. *Mov Disord* 2010;25(7):823-9. doi: 10.1002/mds.22813 [published Online First: 2010/05/13]
43. Rosendal H. Comparative cohort studies in transmural care. Utrecht: Utrecht University, 2002.
44. World Health Organization. Rehabilitation in health systems. Geneva 2017.
45. Krug E, Cieza A. Strengthening health systems to provide rehabilitation services. 2017; 95.
46. Berwick DM, Nolan TW, Whittington J. The triple aim: care, health, and cost. *Health Aff* 2008;27(3):759-69. doi: 10.1377/hlthaff.27.3.759
47. Bodenheimer T, Sinsky C. From Triple to Quadruple Aim: Care of the Patient Requires Care of the Provider. *Ann Fam Med* 2014;12(6):573-76. doi: 10.1370/afm.1713

- 1  
2  
3 48. Craig P, Dieppe P, Macintyre S, et al. Developing and evaluating complex interventions: the  
4 new Medical Research Council guidance. *BMJ* 2008;337:a1655. doi: 10.1136/bmj.a1655  
5 [published Online First: 2008/10/01]  
6 49. Gulliksen J, Göransson B, Boivie I, et al. Key Principles for User-Centred Systems Design.  
7 In: Seffah A, Gulliksen J, Desmarais MC, eds. *Human-Centered Software Engineering*  
8 — Integrating Usability in the Software Development Lifecycle. Dordrecht: Springer  
9 Netherlands 2005:17-36.  
10 50. Hochstenbach LMJ, Courtens AM, Zwakhalen SMG, et al. Co-creative development of an  
11 eHealth nursing intervention: Self-management support for outpatients with cancer pain.  
12 *Appl Nurs Res* 2017;36:1-8. doi: <http://dx.doi.org/10.1016/j.apnr.2017.03.004>  
13 51. Sananet Care BV. Sananet: specialist in eHealth [Available from:  
14 <http://www.sananet.nl/ehealth-specialist.html> accessed 09/08/2018.  
15 52. Leemrijse CJ, Swinkels IC, Veenhof C. Direct access to physical therapy in the Netherlands:  
16 results from the first year in community-based physical therapy. *Phys Ther*  
17 2008;88(8):936-46. doi: 10.2522/ptj.20070308 [published Online First: 2008/06/21]  
18 53. Huyse FJ, Lyons JS, Stiefel FC, et al. "INTERMED": a method to assess health service  
19 needs. I. Development and reliability. *Gen Hosp Psychiatry* 1999;21(1):39-48. [published  
20 Online First: 1999/03/09]  
21 54. Stiefel FC, de Jonge P, Huyse FJ, et al. "INTERMED": a method to assess health service  
22 needs. II. Results on its validity and clinical use. *Gen Hosp Psychiatry* 1999;21(1):49-56.  
23 [published Online First: 1999/03/09]  
24 55. Damschroder LJ, Aron DC, Keith RE, et al. Fostering implementation of health services  
25 research findings into practice: a consolidated framework for advancing implementation  
26 science. *Implement Sci* 2009;4 doi: 10.1186/1748-5908-4-50  
27 56. Hsieh HF, Shannon SE. Three approaches to qualitative content analysis. *Qual Health Res*  
28 2005;15(9):1277-88. doi: 10.1177/1049732305276687 [published Online First:  
29 2005/10/06]  
30  
31  
32

### 33 Reference Table 1

- 34 57. Werkgroep Pijnrevalidatie Nederland. Medisch Specialistische Revalidatie bij chronische  
35 pijn aan het houdings- en bewegingsapparaat. Position Paper. Utrecht, 2017.  
36  
37  
38  
39  
40

### 41 AUTHORS CONTRIBUTIONS

42 JAMCFV, IPJH, and AJK conceived the original idea and outline of the study, and CL, MEK,  
43 IPJH, JAMCFV, and DR contributed to designing the study. JAMCFV, IPJH, and AJK were  
44 responsible for developing the intervention. CL was the primary writer of the study protocol in  
45 collaboration with MEK and IPJH. All authors discussed and commented on draft versions and  
46 approved the final version.  
47  
48  
49  
50  
51

### 52 FUNDING

53 This work was funded by Health Insurance Companies CZ, VGZ and Achmea, the Netherlands.  
54 The funding bodies had no role in the design of the study or writing the manuscript  
55  
56  
57  
58  
59  
60



## COMPETING INTERESTS

CL, MEK and DR have nothing to disclose. AJK, JAMCFV, and IPJH report grants from Health Insurance Companies CZ, VGZ and Achmea, during the conduct of the study;

## ETHICS APPROVAL

Approval from the Medical Ethics Committee Z, the Netherlands, METC 17-N-133.

## OPEN ACCESS

This is an Open Access article distributed in accordance with the Creative Commons Attribution Non Commercial (CC BY-NC 4.0) license, which permits others to distribute, remix, adapt, build upon this work non-commercially, and license their derivative works on different terms, provided the original work is properly cited and the use is non-commercial. See:

<http://creativecommons.org/licenses/by-nc/4.0/>

**Figure 1 Construction of the health care system in Network Pain Rehabilitation Limburg**

**Figure 2 First patient contact and referral options per healthcare setting and discipline. NPRL = Network Pain Rehabilitation Limburg**

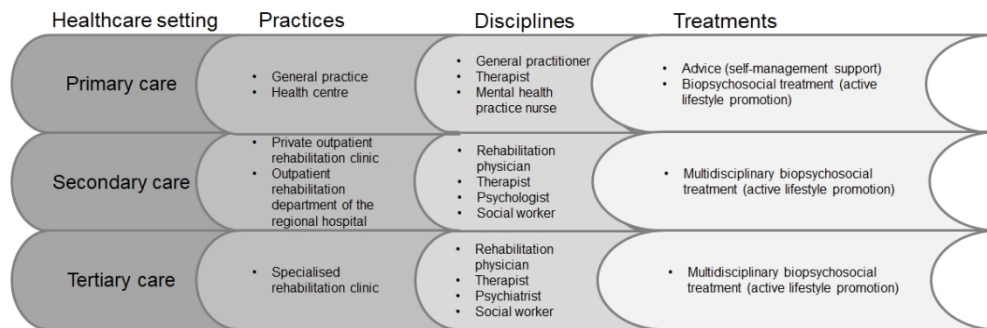

Figure 1 Construction of the health care system in Network Pain Rehabilitation Limburg

321x106mm (96 x 96 DPI)

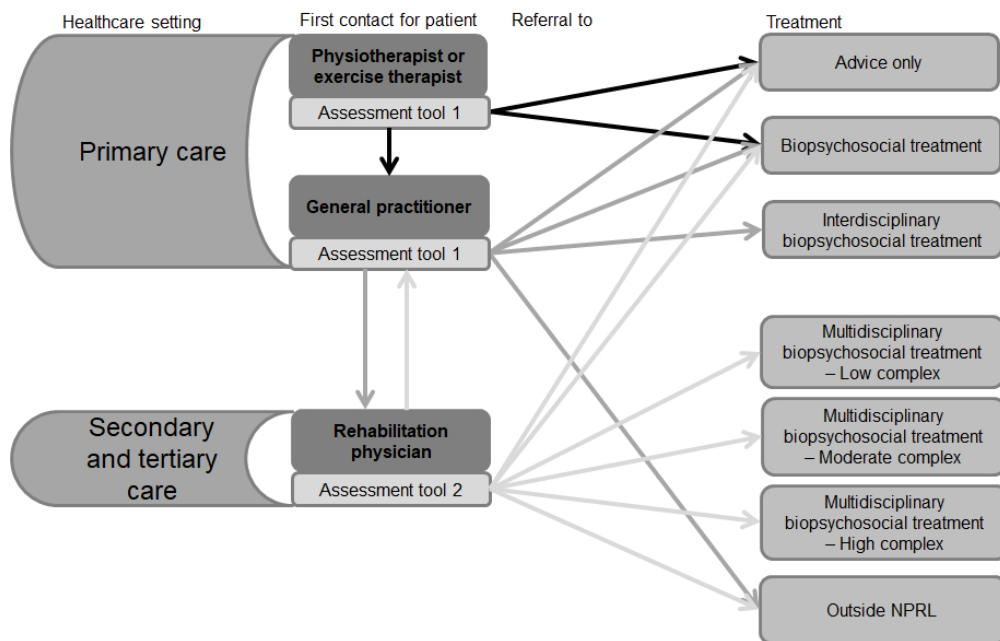

Figure 2 First patient contact and referral options per healthcare setting and discipline. NPRL = Network Pain Rehabilitation Limburg

242x155mm (96 x 96 DPI)



# BMJ Open

## Developing the Network Pain Rehabilitation Limburg: a feasibility study protocol

|                                 |                                                                                                                                                                                                                                                                                                                                                                                                                                                                                                                                                                                                                                                                                                                                                                                                                                      |
|---------------------------------|--------------------------------------------------------------------------------------------------------------------------------------------------------------------------------------------------------------------------------------------------------------------------------------------------------------------------------------------------------------------------------------------------------------------------------------------------------------------------------------------------------------------------------------------------------------------------------------------------------------------------------------------------------------------------------------------------------------------------------------------------------------------------------------------------------------------------------------|
| Journal:                        | <i>BMJ Open</i>                                                                                                                                                                                                                                                                                                                                                                                                                                                                                                                                                                                                                                                                                                                                                                                                                      |
| Manuscript ID                   | bmjopen-2018-025962.R1                                                                                                                                                                                                                                                                                                                                                                                                                                                                                                                                                                                                                                                                                                                                                                                                               |
| Article Type:                   | Protocol                                                                                                                                                                                                                                                                                                                                                                                                                                                                                                                                                                                                                                                                                                                                                                                                                             |
| Date Submitted by the Author:   | 23-Jan-2019                                                                                                                                                                                                                                                                                                                                                                                                                                                                                                                                                                                                                                                                                                                                                                                                                          |
| Complete List of Authors:       | Lamper, Cynthia; Maastricht University CAPHRI School for Public Health and Primary Care, Department of Rehabilitation Medicine<br>Kroese, Mariëlle; Maastricht University CAPHRI School for Public Health and Primary Care, Department of Health Services Research<br>Köke, Albère; Maastricht University CAPHRI School for Public Health and Primary Care, Department of Rehabilitation Medicine; Adelante<br>Ruwaard, Dirk; Maastricht University CAPHRI School for Public Health and Primary Care, Department of Health Services Research<br>Verbunt, Jeanine; Maastricht University CAPHRI School for Public Health and Primary Care, Department of Rehabilitation Medicine; Adelante<br>Huijnen, Ivan ; Maastricht University CAPHRI School for Public Health and Primary Care, Department of Rehabilitation Medicine; Adelante |
| <b>Primary Subject Heading</b>: | Rehabilitation medicine                                                                                                                                                                                                                                                                                                                                                                                                                                                                                                                                                                                                                                                                                                                                                                                                              |
| Secondary Subject Heading:      | Qualitative research, Patient-centred medicine, Health services research, Evidence based practice                                                                                                                                                                                                                                                                                                                                                                                                                                                                                                                                                                                                                                                                                                                                    |
| Keywords:                       | REHABILITATION MEDICINE, HEALTH SERVICES ADMINISTRATION & MANAGEMENT, Musculoskeletal disorders < ORTHOPAEDIC & TRAUMA SURGERY, PAIN MANAGEMENT, PRIMARY CARE, Organisation of health services < HEALTH SERVICES ADMINISTRATION & MANAGEMENT                                                                                                                                                                                                                                                                                                                                                                                                                                                                                                                                                                                         |
|                                 |                                                                                                                                                                                                                                                                                                                                                                                                                                                                                                                                                                                                                                                                                                                                                                                                                                      |

SCHOLARONE™  
Manuscripts

## Developing the Network Pain Rehabilitation Limburg: a feasibility study protocol

Cynthia Lamper<sup>1</sup>, Mariëlle EAL Kroese<sup>2</sup>, Albère J Köke<sup>1,3</sup>, Dirk Ruwaard<sup>2</sup>, Jeanine AMCF Verbunt<sup>1,3</sup>, Ivan PJ Huijnen<sup>1,3</sup>

### Corresponding author

Cynthia Lamper  
Universiteitssingel 40,  
6229 ER Maastricht  
P.O. Box 616, 6200 MD Maastricht  
the Netherlands  
[cynthia.lamper@maastrichtuniversity.nl](mailto:cynthia.lamper@maastrichtuniversity.nl)  
+31 (0)43-3882168

### Author affiliations

<sup>1</sup>Department of Rehabilitation Medicine, School for Public Health and Primary Care (CAPHRI), Maastricht University, Faculty of Healthcare, Medicine and Life Sciences, Maastricht, the Netherlands

<sup>2</sup>Department of Health Services Research, School for Public Health and Primary Care (CAPHRI), Faculty of Healthcare, Medicine and Life Sciences, Maastricht University, Maastricht, the Netherlands

<sup>3</sup>Centre of Expertise in Rehabilitation and Audiology, Adelante, Hoensbroek, the Netherlands

Word count, excluding title page, abstract, references, figures, and tables: 4219

## ARTICLE SUMMARY

### Abstract

Introduction: Patients receiving a rehabilitation treatment for chronic musculoskeletal pain (CMP) face challenges as mismatches often exist between the complexity of patient's pain problem and the treatment offered. This can result in less efficient care for the patient and increased medical shopping. The Network Pain Rehabilitation Limburg (NPRL), a transmurally integrated healthcare network, will be designed to improve daily care for patients with CMP in order to improve their level of functioning despite pain by stimulating a biopsychosocial approach given by all involved healthcare professionals. A feasibility study will be performed which will give insight into the barriers and facilitators, perceived value, acceptability, and implementation strategies for the development, implementation, and transferability of the NPRL.

Methods and analysis: This is a feasibility study with a three-phase iterative and incremental design, based on key principles of an user-centred design. It will examine the barriers and facilitators, perceived value, acceptability, and implementation strategies for the development, implementation, and transferability for further development and refinement of the NPRL. Mixed methods will be used in which healthcare professionals, as well as patients involved in the NPRL, will participate. The results of each phase will be analysed following the Consolidated Framework for Implementation Research (CFIR) and will be used to refine NPRL in daily practise.

Ethics and dissemination: Informed consent will be obtained from all participants. The results of this feasibility study will form the basis for refinement of NPRL and planning of a large-scale process and effect evaluation of the Quadruple Aim outcomes. Dissemination will include publications and presentations at national and international conferences. Ethical approval for this study was granted by the Medical Ethics Committee Z, the Netherlands, METC 17-N-133.

### Keywords

Feasibility, transmurally network, integrated care, pain rehabilitation, musculoskeletal pain, Quadruple Aim

### Strengths and limitations of the study

- This study will be the first to evaluate feasibility of a transmural network for pain patient's rehabilitation, which provides integrated care aiming to improve their level of functioning despite pain by stimulating a biopsychosocial approach given by all involved healthcare professionals.
- In an iterative, user-centered design, mixed methods will be used to evaluate the barriers and facilitators, perceived value, acceptability, and implementation strategies for the development, implementation, and transferability.
- Data will be analysed using the Consolidated Framework for Implementation Research by Damschroder et al.
- The evidence generated from this feasibility study will not only help to adjust the design and content of Network Pain Rehabilitation Limburg, but will also help future studies with developing and implementing transmural networks in healthcare.
- Depending on the results of this feasibility study, a large-scale process and effect evaluation on the Quadruple Aim outcomes will be planned.

## INTRODUCTION

Nineteen percent of adults in Europe suffer from moderate to severe chronic pain with a duration of at least 6 months according to a large-scale epidemiological study.<sup>1</sup> Also, about 18% of adults in the Netherlands have moderate to severe general chronic pain.<sup>2</sup> Almost 90% of individuals with chronic pain had experienced it for over 2 years.<sup>3</sup> The most reported chronic pain complaint was chronic musculoskeletal pain (CMP). CMP is a complex biopsychosocial experience that varies widely between people depending on the context and meaning of the pain and the impact of psychosocial factors on patient's functioning.<sup>4 5</sup>

Breivik *et al*<sup>1</sup> found that people with CMP were less able or even unable to do a range of daily activities and to maintain an independent lifestyle. In addition to pain itself, patients with CMP are often confronted with an elevated level of disability, depression, and anxiety resulting in an increased disease burden.<sup>6-8</sup> In addition, work absenteeism among these patients is very high.<sup>1 9</sup>

<sup>10</sup> In recent years, the direct and indirect costs for CMP patients are estimated at 20 billion Euro's in the Netherlands.<sup>11</sup> These costs are even higher than the annual costs of heart disease, cancer, and diabetes.<sup>12</sup> Although costs for CMP are high, only up to 60-74% of patients with CMP get treated, and only 2-5% get treated by a pain management specialist.<sup>1 2 13</sup>

Currently, regardless treatment as received, 34-79% of Dutch CMP patients still indicate a feeling of inadequate treatment.<sup>2 14</sup> These patients seek a diagnosis or solution to their pain problem, which explains medical shopping. Even 61% of patients that started a multidisciplinary rehabilitation program visited 6 to > 20 different healthcare professionals one year before starting with multidisciplinary rehabilitation program.<sup>15</sup> A potential reason for these inefficiencies might be that the complexity of the patient's pain problem does not match with treatment as delivered, resulting in over or under treatment<sup>16</sup>, which highlights the need for adequate (cost) effective treatment strategies.

This mismatch may be explained by the fact that the knowledge and perspective of healthcare professionals, decision makers, and the public varies regarding CMP, referral, and treatment.<sup>13</sup> Healthcare professionals receive inadequate training on the diagnosis and treatment of CMP, causing different points of view.<sup>17</sup> Some healthcare professionals are more biomedical oriented and focus on explaining and solving the pain, whereas others are more biopsychosocial oriented and focus on optimising functioning despite CMP.<sup>18</sup> Therefore, referral and treatment

1  
2  
3 selections vary among healthcare professionals, which may result in less efficient care for  
4 patients with CMP.  
5  
6

7  
8 Besides the different perspectives regarding CMP, general practitioners (GPs) in primary care  
9 and rehabilitation physicians (RPs) in secondary and tertiary care refer patients mostly based on  
10 their anamnesis and clinical experience. However, it appears to be difficult for GPs to identify  
11 the impact of all psychosocial factors on chronic low back pain patients, one of the most  
12 frequently encountered CMP problems.<sup>19</sup> Recently, different tools became available to support  
13 GPs in the decision-making process concerning (initial) treatment options for patients with  
14 chronic low back pain and fibromyalgia, especially focusing on the impact of psychosocial  
15 components.<sup>20-23</sup> However, these decision-making tools are not implemented in daily care yet in  
16 the Netherlands. In the Dutch health care system, patients with moderate to severe levels of  
17 disability and associated influencing psychosocial factors are seen by a RP. To support decision  
18 making by RPs, an evidence-based objective tool to classify patients objectively and  
19 transparently for a specific treatment is needed. Earlier studies have shown that the interrater  
20 reliability of the method currently used by RPs to classify the level of disability (WPN  
21 classification) is at least questionable.<sup>24 25</sup> In addition, healthcare professionals indicate a lack of  
22 overview regarding the complete supply of treatment methods, resulting in inadequate  
23 referrals.<sup>26</sup>  
24  
25  
26  
27  
28  
29  
30  
31  
32  
33

34  
35 Ideally, after assessing the level of disability, the patient receives a treatment matching the  
36 complexity of the pain problem in line with the biopsychosocial profile. As in most situations, no  
37 cure for CMP is possible and evidence-based treatments are multicomponent pain rehabilitation  
38 with a biopsychosocial focus on being active and living a valuable life despite pain.<sup>5 27-29</sup> In  
39 primary care physiotherapy, cognitive-behavioural interventions and interventions focusing on  
40 biopsychosocial factors have shown long-term effects on patient outcomes.<sup>30 31</sup> Moreover, even  
41 positive effects were found when advice combined with pain education alone is given by GPs or  
42 therapists to patients with CMP.<sup>32-34</sup> In secondary and tertiary care, multidisciplinary pain  
43 rehabilitation programs with physical, psychological, and/or social/work related components, like  
44 Acceptance Commitment Therapy (ACT), Graded Activity (GA), and Exposure in vivo (EXP),  
45 are more effective than treatments focusing on one aspect of the biopsychosocial model for  
46 decreasing pain and disability in patients with disabling chronic low back pain.<sup>35-40</sup>  
47  
48  
49  
50  
51  
52  
53  
54  
55  
56  
57  
58  
59  
60

1  
2  
3 Despite this knowledge of the effective components of multidisciplinary rehabilitation programs,  
4 a wide variety of treatment approaches in various dosages are currently applied in regular  
5 rehabilitation programs in different private and public rehabilitation centres.<sup>41</sup> To overcome the  
6 different points of view as well as the lack of overview about treatment options, objective  
7 decision-making tools, and variety of treatments in the Netherlands, a national care standard for  
8 chronic pain was presented in 2017.<sup>11</sup> In this standard, a stepped and person-centred care  
9 approach for patients with CMP was proposed.  
10  
11  
12  
13  
14

15  
16 To implement care as part of the national care standard, a transmurals network could be  
17 designed in which different healthcare professionals collaborate in providing person-centred  
18 rehabilitation care. Recently, different transmurals integrated care health networks, for example  
19 for Parkinson's disease and palliative care, have been successfully developed and implemented  
20 in the Netherlands.<sup>42 43</sup> In line with these findings, a transmurals pain rehabilitation network can  
21 provide a shared vision regarding CMP, including early recognition of subacute pain patients  
22 followed by suitable person-centred treatment and referral, is supposed to improve patients'  
23 levels of functioning despite pain and to prevent medical shopping of patients with CMP.<sup>11</sup> It  
24 should have an unambiguous view, stepped care, and a person-centred approach with  
25 guidelines for referral and treatment, coordination, and a continuous focus on improvement of  
26 care to increase the effectiveness, quality, and efficiency of healthcare for patients with CMP.<sup>44</sup>  
27 This approach fits with the advice of the World Health Organisation to focus on stimulating  
28 functioning when designing rehabilitation care.<sup>45 46</sup>  
29  
30  
31  
32  
33  
34  
35  
36  
37

38 The Network Pain Rehabilitation Limburg (NPRL), a transmurals integrated healthcare network  
39 for CMP rehabilitation, will be designed to ultimately fulfil the Quadruple Aim in the province of  
40 Limburg, the Netherlands.<sup>47 48</sup> The aim is to provide integrated care for patients with CMP in  
41 order to improve their level of functioning despite pain by stimulating a biopsychosocial  
42 approach for all involved healthcare professionals. As a first step a feasibility study will be  
43 performed. This study provides insight into the barriers and facilitators, perceived value,  
44 acceptability, and implementation strategies for the development, implementation, and  
45 transferability of the NPRL. This paper describes the study protocol of the feasibility study of  
46 NPRL for adults with CMP.  
47  
48  
49  
50  
51  
52  
53  
54  
55  
56  
57  
58  
59  
60

## METHODS

### Study design

A feasibility study with an iterative and incremental design, based on key principles of user-centred design<sup>49 50</sup> will be conducted in the South-East region of the Netherlands from October 2017 till October 2018. This will follow the UK Medical Research Council framework<sup>51</sup> for developing complex interventions. It will be useful as NPRL is a complex intervention because of the number of practices and integrated healthcare settings targeted in the NPRL and the number and variability of outcomes. In this iterative process, the development of NPRL will take place in three phases, namely development, implementation, and transferability. The results of each phase will be used to refine the elements of the intervention and to shape the next phase, in which the barriers and facilitators of the different phases will be evaluated. During meetings, all healthcare professionals involved will be informed about the results and the adjustments to NPRL. In the subsequent phase, new adjustments will be integrated in daily practise. The development and implementation process will be 'practise-focused', indicating that the development will be based on the healthcare professionals' experiences with the current healthcare situation.

In phase 1, exploration of context will take place in order to develop the design of the NPRL and to educate the healthcare professionals involved. The focus will be on the barriers and facilitators in the development process of NPRL. Next, in phase 2 (implementation), the project focus will be on the specification of the content to adjust the design of the NPRL to daily practise. More insight into the barriers and facilitators of the implementation process will be collected. In phase 3 (transferability), the project will focus on the organisation of care in daily practise and the research focus will be on the barriers and facilitators for further implementation in other practices and organisations. In addition, preliminary data on efficiency will be collected. The qualitative data collected during the study will be analysed using The Consolidated Framework for Implementation Research (CFIR).<sup>52</sup> NPRL will be feasible in daily practise if the studied barriers and facilitators from the perspectives of healthcare professionals and patients are translatable to policies or guidelines that can be adjusted and integrated in daily practise.

### Participants

In this transmural NPRL, healthcare professionals from different disciplines (GPs, physiotherapists, exercise therapists, mental health practice nurses, RPs, and rehabilitation



teams) and different healthcare settings (primary, secondary, and tertiary care) will be asked for participation (Figure 1). The setting in primary care concerns general and therapy practices, in secondary care a private outpatient rehabilitation clinic and the outpatient rehabilitation department of a regional hospital, and in tertiary care a specialised rehabilitation clinic. The quality criteria established for practices and organisations for enrolling in NPRL are described in Table 1.

Table 1: Inclusion criteria for healthcare professionals for enrolling in NPRL

| Inclusion                                                                                                                                                                                                                       | Exclusion                                                                                                                            |
|---------------------------------------------------------------------------------------------------------------------------------------------------------------------------------------------------------------------------------|--------------------------------------------------------------------------------------------------------------------------------------|
| Having a practice in the pilot area of NPRL.                                                                                                                                                                                    | A GP who has visited less than 2 out of 3 education days or a therapist who has participated in less than 3 out of 4 education days. |
| Willingness to attend the meetings and to implement the different elements of NPRL.                                                                                                                                             | Are not able to implement the protocols or assessment tool of NPRL in their own practice.                                            |
| GPs and mental health practice nurses must be linked to a participating therapist in order to make effective referrals to treat patients in (interdisciplinary) primary care regarding the protocol and vision of NPRL.         |                                                                                                                                      |
| Physiotherapists having a participating GP or RP. As they cannot refer a patient when the patient is too complex for them, they will not have an inclusion option for study participants if there is no participating GP or RP. |                                                                                                                                      |
| Secondary and tertiary organisations have to meet the criteria of the Position Paper 'Medical Specialist Rehabilitation for chronic musculoskeletal pain' [2017]. <sup>53</sup>                                                 |                                                                                                                                      |
| NPRL = Network Pain Rehabilitation Limburg; GP = general practitioner; RP = rehabilitation physician                                                                                                                            |                                                                                                                                      |

In primary care, the recruitment will start with a primary care therapist or a GP interested in pain, and after consent to participate in NPRL. This person will be asked to recruit a GP or therapist with whom they already have intensive collaboration. For secondary and tertiary care, main organisations in the region providing rehabilitation care for patients with CMP will be asked to participate, so all healthcare settings in this region will be covered. Because of the nature and aim of this feasibility study, we decided to keep the number of healthcare professionals restricted. Based on earlier research, it has to be expected that in this situation the implementation process in daily practise can be easily adjusted when barriers arise.<sup>43</sup>

In addition to the involvement of healthcare professionals in this study, all patients treated by the participating healthcare professionals will be asked to evaluate NPRL and the perceived quality of care. The inclusion criteria for patients to participate in this study are described in Table 2.

| Inclusion                                                                | Exclusion                                                                                                                                                                                           |
|--------------------------------------------------------------------------|-----------------------------------------------------------------------------------------------------------------------------------------------------------------------------------------------------|
| Age $\geq$ 18 years old at the start of the study.                       | Any suspicion of a medical (orthopaedic, rheumatic, or neurological) disease that can explain the current pain (e.g. rheumatism or hernia) complaints or that can be treated by sufficient therapy. |
| Patient living in the pilot area (physiotherapist, GP, or RP) of NPRL.   |                                                                                                                                                                                                     |
| Having musculoskeletal pain that is (suspected to be) chronic.           | Any suspicion of a (underlying) psychiatric disease, for which psychiatric treatment is better suited, according to the expert opinion of the GP and RP.                                            |
| Treatment aim of the patient is to improve functioning despite the pain. | Pregnancy.                                                                                                                                                                                          |
| Adequate Dutch literacy to complete the assessments.                     |                                                                                                                                                                                                     |

NPRL = Network Pain Rehabilitation Limburg; GP = general practitioner; RP = rehabilitation physician

It is expected that approximately 100 patients from all participating healthcare settings will give informed consent during the course of this study. They will receive questionnaires regarding satisfaction with care and their health status and pain related disability. Moreover, a sample of approximately 10 patients, who finished a treatment according to the protocol of NPRL, will be recruited for a focus group. In this focus group more information about barriers and facilitators from a patient perspective will be collected. In this way patients are able to react to each other which will illuminate various perspectives which leads to a faster data saturation about each topic, which is an advantage above interviews.<sup>54</sup>

### **Intervention: Network Pain Rehabilitation Limburg**

The main aim of NPRL is to provide integrated care for patients with CMP in order to improve their level of functioning despite pain by stimulating a biopsychosocial approach for all involved healthcare professionals. This should accomplish the Quadruple Aim: improvement of CMP patient functioning, experiences of care, and work life satisfaction of physicians and staff, as well as a reduction of healthcare costs of patients with CMP.

1  
2  
3  
4  
5 Each patient will receive the treatment needed to reach his/her optimal level of functioning. In  
6 order to reach this, a stepped care approach will be used for every individual patient. Depending  
7 on the level of disability and biopsychosocial factors involved, this will either include; 1)  
8 education only and no further treatment, 2) monodisciplinary treatment in primary care, 3)  
9 multidisciplinary treatment in primary care (collaboration between GPs, primary care therapists,  
10 and mental health practice nurses in assessing and treating patients with CMP who need  
11 mental support besides physical exercise), 4) interdisciplinary treatment in secondary or 5)  
12 interdisciplinary treatment in tertiary care. Collaboration will be supported by facilitating  
13 communication between patients and all healthcare professionals involved in the trajectory of an  
14 individual patient by E-health.<sup>55</sup> In addition, the collaboration between healthcare professionals  
15 in different practices and organisations will be further supported by informative meetings and  
16 education days.

17  
18  
19  
20  
21  
22  
23  
24  
25 In order to facilitate the joint focus on improving the level of functioning despite pain, the  
26 following elements are integrated in NPRL:

27  
28  
29  
30 *Integral focus on assessment and referral: assessment tools*

31 To support the healthcare professionals in their decision making for problem mapping and  
32 treatment selection, two evidence-based objective assessment tools will be used. These tools  
33 will support the assessment of the complexity of the pain problem; one tool for GPs and primary  
34 care therapists and one tool for RPs. The assessment tool for primary care is based on the Start  
35 Back Tool<sup>20</sup> and will help to advise patient treatment matched to the patient's biopsychosocial  
36 profile. The options are: advice only, treatments in primary care, or for decision making by a RP  
37 (Figure 2). The GP can also decide to advise patients for a treatment outside NPRL  
38 (psychiatrist, specific healthcare specialist, etc.). Since 2006, patients in the Netherlands can  
39 visit a primary care therapist without a referral of a GP,<sup>56</sup> so these therapists will also use this  
40 assessment tool. In this situation, a primary care therapist of NPRL will advise the patient to visit  
41 the GP for additional assessment and referral if needed as the GP is the gatekeeper to  
42 secondary and tertiary care.

43  
44  
45  
46  
47  
48  
49  
50  
51  
52 When a patient visits a RP, the assessment tool for specialised rehabilitation care is used for  
53 decision making. This tool will assess the patient's view as well as the RP's view of the  
54 biopsychosocial problem and consists of two parts. The first part will guide the anamnesis of the  
55  
56  
57

1  
2  
3 RP and is based on two different ways to score disability related complexity, namely the Case  
4 Complexity Index and INTERMED method.<sup>25 57 58</sup> First, a standardised scoring method for  
5 assessing the biopsychosocial profile and care for the past and current situations will be used  
6 by the RP. Second, a set of CMP related questionnaires assessing anxiety, depression,  
7 catastrophising, fatigue, pain level, participation level, and general health will be completed by  
8 the patient. After completion of these questionnaires, scores will be interpreted by the RP.  
9 Based on scoring in both parts of the RP-assessment tool, patients will be categorised by  
10 profile, representing the patient's level of disability. In addition to primary and interdisciplinary  
11 primary care, the second tool will assist the RP to further differentiate between available  
12 secondary or tertiary multidisciplinary rehabilitation programs (Figure 2).  
13  
14  
15  
16  
17  
18  
19

20  
21 *Integral focus on treatment content and duration: treatment protocols*

22 When the patient receives treatment, an individualised treatment plan based on their current  
23 needs will be made. The patient decides the treatment aim when he visits a healthcare  
24 professional. In case this is necessary, the practitioner will support the patient in setting  
25 functional goals. Protocols will be based on the most recent evidence-based treatment methods  
26 such as GA, EXP, and ACT<sup>35-38 40</sup> and these will be used in all healthcare settings. As these  
27 evidence-based methods are developed for secondary and tertiary care, they will be adjusted  
28 for primary care. During evaluations in phase 1 and 2, healthcare professionals will be invited to  
29 provide feedback on the treatment protocols. As a result, adjustments to the content and  
30 duration of treatment protocols will be made if these adjustments are in line with the evidence-  
31 based treatment methods.  
32  
33  
34  
35  
36  
37  
38

39  
40 *Integral focus on self-management: E-health application*

41 All professionals and patients participating in the NPRL will make use of an E-health application:  
42 SanaCoach Pain Rehabilitation.<sup>55</sup> Also, primary care patients who receive 'advice only' can  
43 make use of this SanaCoach Pain Rehabilitation. The coach has different functions and goals in  
44 the treatment process. The primary goal is to support self-management. The main function of  
45 the coach is to provide pain education based on the education modules. Different eLearning  
46 modules are developed for the patients in order to teach them about the biopsychosocial  
47 aspects of pain. Furthermore, diaries are integrated into the coach in which patients can give  
48 feedback on changes in pain intensity, level of activity over time, and the interrelation between  
49 these variables. Moreover, healthcare professionals can use scores from these diaries to adjust  
50 treatment to individual patients. The coach also consists of a chat function between the patient  
51  
52  
53  
54  
55  
56  
57  
58  
59  
60

and healthcare professionals to ensure short communication lines. All healthcare professionals involved in the care process of a patient have access to this chat function with that patient. Additionally, the assessment tool for primary care is integrated, which makes these results available for all involved healthcare professionals. For this study, the questionnaires for patients are also available via the coach. Based on the level of complexity of disability, the functions in the SanaCoach Pain Rehabilitation will be adjusted to the patient, such as the number of diaries and level of education.

### Patient and Public Involvement

During the development of the research question, design, recruitment, and conduct of the study no patients were involved in the process. However, during the development of NPRL itself, a patient was involved in the development of the SanaCoach Pain Rehabilitation and treatment protocols. Moreover, the focus of this feasibility study is mainly on healthcare professionals. They were involved in the development of the treatment protocols, SanaCoach Pain Rehabilitation and in the development of the different communication strategies between the healthcare professionals themselves. The results of the study will be disseminated to the study participants via the webpage ([www.netwerkpijnrevalidatie.nl](http://www.netwerkpijnrevalidatie.nl)) and social media accounts.

### Data collection

In this study, the feasibility of the development, implementation, and transferability of NPRL for adults with CMP will be investigated. Therefore, different data collection techniques such as observations, interviews, focus groups, and questionnaires will be combined to get more insight into the barriers and facilitators of NPRL (Table 3).

| Phase                   | 1                                                                                                                                       | 2                                                                                               | 3                                                                                                                             |
|-------------------------|-----------------------------------------------------------------------------------------------------------------------------------------|-------------------------------------------------------------------------------------------------|-------------------------------------------------------------------------------------------------------------------------------|
| Time period             | October 2017–February 2018                                                                                                              | February 2018–June 2018                                                                         | June 2018–October 2018                                                                                                        |
| Goal project            | Exploration of context will take place in order to develop the design of the NPRL and to educate the involved healthcare professionals. | Specification of the content to adjust the design of the transmurial network to daily practise. | Organisation of care in daily practise and barriers and facilitators for implementation in other practices and organisations. |
| Goal evaluation         | Insight into the barriers and facilitators of the development of NPRL.                                                                  | Insight into the barriers and facilitators of the implementation of NPRL.                       | Insight into the barriers and facilitators of the transferability of NPRL.                                                    |
| Data collection method, | <u>Focus groups and interviews</u><br><i>Healthcare professionals</i>                                                                   | <u>Focus groups and interviews</u><br><i>Healthcare professionals</i>                           | <u>Focus groups and interviews</u><br><i>Healthcare professionals</i>                                                         |

|                                                                                                                                                                                                                                                                                                                                                                                                                                                                                                                                                                                                                                                                                                                                                                                                                                                           |                                                                                                                                                                                                                                                                                                                                                                                                                                                                                                                                     |                                                                                                                                                                                                                                                                      |                                                                                                                                                                                                                                                                                                                                                                                                                                                                                                                                                                                                                                                                                                                                        |
|-----------------------------------------------------------------------------------------------------------------------------------------------------------------------------------------------------------------------------------------------------------------------------------------------------------------------------------------------------------------------------------------------------------------------------------------------------------------------------------------------------------------------------------------------------------------------------------------------------------------------------------------------------------------------------------------------------------------------------------------------------------------------------------------------------------------------------------------------------------|-------------------------------------------------------------------------------------------------------------------------------------------------------------------------------------------------------------------------------------------------------------------------------------------------------------------------------------------------------------------------------------------------------------------------------------------------------------------------------------------------------------------------------------|----------------------------------------------------------------------------------------------------------------------------------------------------------------------------------------------------------------------------------------------------------------------|----------------------------------------------------------------------------------------------------------------------------------------------------------------------------------------------------------------------------------------------------------------------------------------------------------------------------------------------------------------------------------------------------------------------------------------------------------------------------------------------------------------------------------------------------------------------------------------------------------------------------------------------------------------------------------------------------------------------------------------|
| <p>respondents, and outcomes</p>                                                                                                                                                                                                                                                                                                                                                                                                                                                                                                                                                                                                                                                                                                                                                                                                                          | <ul style="list-style-type: none"> <li>Experiences with the informative meetings</li> <li>Experiences with the education days</li> <li>Expectations and views on working in NPRL</li> <li>Current experiences (satisfaction) with working in NPRL</li> <li>Barriers and facilitators</li> </ul> <p><u>Questionnaire</u><br/><i>Healthcare professionals</i></p> <ul style="list-style-type: none"> <li>Current views and thoughts regarding patients with CMP</li> <li>Referral pattern</li> <li>Patient characteristics</li> </ul> | <ul style="list-style-type: none"> <li>Views on working in NPRL</li> <li>Current experiences (satisfaction) with working in NPRL</li> <li>Implications and recommendations of the implementation strategy for practise</li> <li>Barriers and facilitators</li> </ul> | <ul style="list-style-type: none"> <li>Current experiences (satisfaction) with working in NPRL</li> <li>Implications and recommendations of the implementation strategy for practise</li> <li>Implications and recommendations for future research and project</li> <li>Satisfaction with NPRL and with work life</li> <li>Barriers and facilitators</li> </ul> <p><u>Focus group</u><br/><i>+/- 10 patients</i></p> <ul style="list-style-type: none"> <li>Perceived quality of care</li> <li>Experiences with NPRL</li> <li>Barriers and facilitators</li> </ul> <p><u>Questionnaire</u><br/><i>Healthcare professionals</i></p> <ul style="list-style-type: none"> <li>Referral pattern</li> <li>Patient characteristics</li> </ul> |
| <p><u>Questionnaire start and end of treatment (T0 and T2)</u></p> <p><i>Patients</i></p> <ul style="list-style-type: none"> <li>Health status</li> <li>Quality of care</li> <li>Usability of the SanaCoach Pain Rehabilitation</li> </ul> <p><u>Questionnaire after referral (T1)</u></p> <p><i>Patients</i></p> <ul style="list-style-type: none"> <li>Quality and satisfaction with referral and care</li> </ul> <p><u>Questionnaire or logbook of treatment</u></p> <p><i>Healthcare specialists</i></p> <ul style="list-style-type: none"> <li>Barriers and facilitators of the treatment protocol per patient</li> </ul> <p><u>Notes</u></p> <ul style="list-style-type: none"> <li>Current views regarding NPRL</li> <li>Barriers and facilitators</li> </ul> <p>NPRL = Network Pain Rehabilitation Limburg; CMP= chronic musculoskeletal pain</p> |                                                                                                                                                                                                                                                                                                                                                                                                                                                                                                                                     |                                                                                                                                                                                                                                                                      |                                                                                                                                                                                                                                                                                                                                                                                                                                                                                                                                                                                                                                                                                                                                        |

1  
2  
3 During the informative meetings and education days, field notes will be made in order to collect  
4 information about the views on NPRL and its elements out of the perspectives of the healthcare  
5 professionals involved. At the end of each phase, focus groups and/or interviews will take place  
6 with (a selection of) the healthcare professionals involved. During the evaluation of phase 1,  
7 healthcare professionals will be asked about the barriers and facilitators they perceived while  
8 working in NPRL. Therefore, more information will be collected about expectations, views,  
9 experiences, and satisfaction. Also, experiences and opinions about the informative meetings  
10 and education days will be collected. Healthcare professionals will fill in an electronic  
11 questionnaire in phase 1 concerning decision making, treatments, and characteristics of the  
12 patients involved in the study. This information will give more insight into potential changes in  
13 referral policy between the situation in usual care and the situation within NPRL. Moreover, the  
14 questionnaire also asks for knowledge and perspectives regarding patients with CMP.  
15  
16  
17  
18  
19  
20  
21  
22  
23

24 In phases 2 and 3, more emphasis will be put on the added value of NPRL including barriers  
25 and facilitators for implementation. This information will be used for recommendations for  
26 practise and future research. Also in these phases, information will be gained about the  
27 experiences and satisfaction with NPRL during a focus group with healthcare professionals.  
28 Moreover, in phase 3 (transferability), they will fill in an electronic questionnaire concerning  
29 decision making, treatments, and characteristics of the patients involved in the study. As part of  
30 the evaluation of phase 3, a focus group with a sample of 6 to 10 patients with CMP who are  
31 being treated by participating healthcare professionals will take place. During this focus group,  
32 the emphasis will be on the satisfaction of care and experiences, leading to barriers and  
33 facilitators with NPRL.  
34  
35  
36  
37  
38  
39  
40

41 Besides this information, the research team will keep up a logbook to get insight into the barriers  
42 and facilitators of NPRL. The field notes in this logbook will be the results of discussions with  
43 different healthcare professionals, patients, and stakeholders, as well as researchers.  
44 Additionally, patients will be asked to complete study-related questionnaires about the quality  
45 and their satisfaction with the decision making, treatment and education, and usability of the  
46 SanaCoach Pain Rehabilitation in order to further improve different elements of NPRL. Besides  
47 this feasibility data, also some questions about their work status, general health, and  
48 participation level will be asked as preliminary data on efficiency to objectify the progress of the  
49 treatment. They will receive this questionnaire at the start of the treatment (T0) and at the end of  
50 the treatment (T2). Patients referred to another healthcare professional will receive an extra  
51  
52  
53  
54  
55  
56  
57  
58  
59  
60

1  
2  
3 questionnaire after the referral (T1) regarding the quality of and satisfaction with the decision  
4 making. Additionally, after completion of the treatment, a small questionnaire or logbook about  
5 the treatment of each patient separately must be handed in by the healthcare professionals.  
6  
7 This information will be used to discover barriers and facilitators and desired adjustments of the  
8 treatment protocols.  
9  
10

### 11 12 **Data Analysis**

13  
14 In this iterative design with key principles of user-centered design, the results will be gathered in  
15 daily practice from the healthcare professional and patient perspective. The results of each  
16 phase will be used to adapt the intervention for the next phase. The Consolidated Framework  
17 for Implementation Research (CFIR) protocol according to Damschroder *et al*<sup>52</sup> will be used to  
18 develop this feasibility evaluation and analysis plan of the results. This explanatory framework  
19 with theory-based constructs and mechanisms will be used to explain whether an  
20 implementation may or may not succeed and to identify barriers and facilitators.  
21  
22  
23  
24

25  
26 All field notes and logbooks will be collected. Additionally, the focus groups and interviews will  
27 be audio recorded and transcribed verbatim. Qualitative data will be analysed using the NVivo  
28 software (NVivo.version 11.1.0.411) following a directed content analysis method.<sup>59</sup> The  
29 analysis will be deductive (e.g. the identified themes will derive from existing theory). After  
30 familiarisation with the data, definitions for the CFIR constructs will be made based on the  
31 intervention in collaboration with the project team. Next, the different constructs will be assigned  
32 to the fewest codes possible. After developing analytic summaries and matrices, the data will be  
33 compared to derive barriers and facilitators. A researcher with expertise in qualitative research  
34 without any involvement in the project will peer review the analysis by verification of the analysis  
35 of 20% of the interviews and focus groups. Also, a cross-check for interim findings with  
36 respondents will be performed.  
37  
38  
39  
40  
41  
42  
43  
44

45  
46 Quantitative data will be analysed concurrently with the qualitative data. Descriptive statistics  
47 will be denoted as mean (standard deviation) or median (range) and number (%) for continuous  
48 and categorical data, respectively, with the use of IBM SPSS Statistics 24.  
49  
50

### 51 52 **ETHICS AND DISSEMINATION**

53  
54 Informed consent will be obtained from all participants. Ethical approval for this study was  
55 granted by the Medical Ethics Committee Z, the Netherlands, METC 17-N-133. The results of  
56  
57



1  
2  
3 this feasibility study will form the base for refinement of NPRL and planning of a large-scale  
4 process and effect evaluation on the Quadruple Aim outcomes. Dissemination will include  
5 publications and presentations at national and international conferences.  
6  
7

## 8 9 **DISCUSSION**

10  
11 This study will provide insight into the feasibility of NPRL, a transmural integrated healthcare  
12 network for CMP rehabilitation. The aim is to provide integrated care for patients with CMP in  
13 order to improve their level of functioning despite pain by stimulating a biopsychosocial  
14 approach for all involved healthcare professionals. It is expected that the study will provide  
15 information on barriers and facilitators, perceived value, acceptability, and implementation  
16 strategies for the development, implementation, and transferability for further develop and  
17 refinement of the NPRL. If the study results suggest that NPRL is feasible and preliminary  
18 outcomes are positive, a large-scale process and effective evaluation of the Quadruple Aim  
19 outcomes will be performed.  
20  
21  
22  
23  
24  
25

26  
27 The process of developing NPRL is in accordance with the Medical Research Council guidance  
28 on how to develop and evaluate complex interventions.<sup>51</sup> In the development process, existing  
29 evidence together with collected evidence based on the expertise of healthcare professionals  
30 was combined to develop the first version of NPRL. This first version of NPRL will be  
31 implemented on a restricted scale to test the feasibility. The evidence generated from this  
32 feasibility study will not only help to adjust the design and content of NPRL but will also inform  
33 future methodological studies on developing and implementing a transmural network in  
34 healthcare. It is expected that this bottom-up development in combination with the limited  
35 number of participating healthcare professionals will lead to a successful implementation of the  
36 network. Nijkrake *et al*<sup>43</sup> did indicate this approach as one of the success factors of  
37 ParkinsonNet, a successful and cost-effective network in the Netherlands for patients with  
38 Parkinson's disease.  
39  
40  
41  
42  
43  
44  
45  
46

47 In conclusion, there is need for a transmural network in which different healthcare professionals  
48 collaborate in providing integrated healthcare for patients with CMP. The aim of NPRL is to  
49 improve the level of functioning of individual patients despite pain, experience of care by  
50 patients, and work-life satisfaction for physicians and staff, as well as a reduction in costs.  
51 Therefore, this feasibility study will be conducted to explore the barriers and facilitators of the  
52  
53  
54  
55  
56  
57  
58  
59  
60

development, implementation, and transferability of NPRL. The results will be applied to refine a large-scale process and effective evaluation of the Quadruple Aim outcomes.

## REFERENCES

1. Breivik H, Collett B, Ventafridda V, et al. Survey of chronic pain in Europe: prevalence, impact on daily life, and treatment. *Eur J Pain* 2006;10(4):287-333. doi: 10.1016/j.ejpain.2005.06.009
2. Bekkering GE, Bala MM, Reid K, et al. Epidemiology of chronic pain and its treatment in The Netherlands. *Neth J Med* 2011;69(3):141-53.
3. Breivik H, Eisenberg E, O'Brien T, et al. The individual and societal burden of chronic pain in Europe: the case for strategic prioritisation and action to improve knowledge and availability of appropriate care. *BMC Public Health* 2013;13:1229. doi: 10.1186/1471-2458-13-1229
4. Bushnell MC, Ceko M, Low LA. Cognitive and emotional control of pain and its disruption in chronic pain. *Nat Rev Neurosci* 2013;14(7):502-11. doi: 10.1038/nrn3516
5. Gatchel RJ, Peng YB, Peters ML, et al. The biopsychosocial approach to chronic pain: scientific advances and future directions. *Psychol Bull* 2007;133(4):581-624. doi: 10.1037/0033-2909.133.4.581
6. Bair MJ, Robinson RL, Katon W, et al. Depression and pain comorbidity: a literature review. *Arch Intern Med* 2003;163(20):2433-45. doi: 10.1001/archinte.163.20.2433 [published Online First: 2003/11/12]
7. Jackson T, Wang Y, Wang Y, et al. Self-efficacy and chronic pain outcomes: a meta-analytic review. *J Pain* 2014;15(8):800-14. doi: 10.1016/j.jpain.2014.05.002
8. Lerman SF, Rudich Z, Brill S, et al. Longitudinal associations between depression, anxiety, pain, and pain-related disability in chronic pain patients. *Psychosom Med* 2015;77(3):333-41. doi: 10.1097/PSY.0000000000000158
9. Borghouts J, Janssen H, Koes B, et al. The management of chronic neck pain in general practice. A retrospective study. *Scand J Prim Health Care* 1999;17(4):215-20.
10. Huisstede BM, Wijnhoven HA, Bierma-Zeinstra SM, et al. Prevalence and characteristics of complaints of the arm, neck, and/or shoulder (CANS) in the open population. *Clin J Pain* 2008;24(3):253-9. doi: 10.1097/AJP.0b013e318160a8b4
11. Zorgstandaard Chronische Pijn 2017 [Available from: [http://www.dutchpainsociety.nl/files/ZorgStandaard\\_Chronische\\_Pijn\\_versie\\_2017\\_03\\_28.pdf](http://www.dutchpainsociety.nl/files/ZorgStandaard_Chronische_Pijn_versie_2017_03_28.pdf) accessed 23/07/2018.
12. Rijksinstituut voor Volksgezondheid en Milieu. 2018 [Available from: <https://www.volksgezondheidenzorg.info/> accessed 19/07/2018.
13. Niv D, Devor M, European Federation of IC. Position paper of the European Federation of IASP Chapters (EFIC) on the subject of pain management. *Eur J Pain* 2007;11(5):487-9. doi: 10.1016/j.ejpain.2007.03.005 [published Online First: 2007/04/17]
14. Krol M, de Boer D, Plass A, et al. CQ-index module Pijn: meetinstrumentontwikkeling. Utrecht: NIVEL 2013.
15. Koke AJ, Smeets RJ, Schreurs KM, et al. Dutch Dataset Pain Rehabilitation in daily practice: Content, patient characteristics and reference data. *Eur J Pain* 2017;21(3):434-44. doi: 10.1002/ejp.937 [published Online First: 2016/09/17]
16. Peerenboom PBG, Spek J. Medisch Specialistische Revalidatie; Aanspraak en praktijk. Elst, The Netherlands: Tangram Zorgadviseurs, 2013.
17. Committee on Education of the EFIC (European Federation of IASP Chapters). The Pain Management Core Curriculum for European Medical Schools, 2013:33.

18. Froud R, Patterson S, Eldridge S, et al. A systematic review and meta-synthesis of the impact of low back pain on people's lives. *BMC Musculoskelet Disord* 2014;15:50. doi: 10.1186/1471-2474-15-50
19. Jellema P, van der Windt DA, van der Horst HE, et al. Why is a treatment aimed at psychosocial factors not effective in patients with (sub)acute low back pain? *Pain* 2005;118(3):350-9. doi: 10.1016/j.pain.2005.09.002
20. Hill JC, Dunn KM, Lewis M, et al. A primary care back pain screening tool: identifying patient subgroups for initial treatment. *Arthritis Rheum* 2008;59(5):632-41. doi: 10.1002/art.23563 [published Online First: 2008/04/29]
21. Hill JC, Whitehurst DG, Lewis M, et al. Comparison of stratified primary care management for low back pain with current best practice (STarT Back): a randomised controlled trial. *Lancet* 2011;378(9802):1560-71. doi: 10.1016/s0140-6736(11)60937-9 [published Online First: 2011/10/04]
22. Linton SJ, Boersma K. Early identification of patients at risk of developing a persistent back problem: the predictive validity of the Orebro Musculoskeletal Pain Questionnaire. *Clin J Pain* 2003;19(2):80-6. [published Online First: 2003/03/05]
23. van Eijk-Hustings Y, Kroese M, Bessems-Beks M, et al. Supporting healthcare professionals systematically to improve the quality and person-centeredness of fibromyalgia management in primary healthcare. *2012* 2012;2(4):8. doi: 10.5750/ijpcm.v2i4.297 [published Online First: 2012-12-06]
24. Boonstra AM, Schiphorst Preuper HR, Brouwer M, et al. Classificatie van patiënten met chronische pijnklachten; onderzoek naar de betrouwbaarheid van de WPN niveaus. *Nederlandstalig Tijdschrift Pijnbestrijding* 2011; 30(46).
25. Waterschoot FP, Bennen E, van der Woude LH, et al. Case complexity in patients with chronic nonspecific musculoskeletal pain: a Delphi and feasibility study. *Int J Rehabil Res* 2016;39(1):48-56. doi: 10.1097/MRR.000000000000144
26. van Tulder M, Becker A, Bekkering T, et al. Chapter 3. European guidelines for the management of acute nonspecific low back pain in primary care. *Eur Spine J* 2006;15 Suppl 2:S169-91. doi: 10.1007/s00586-006-1071-2
27. Johnson RE, Jones GT, Wiles NJ, et al. Active exercise, education, and cognitive behavioral therapy for persistent disabling low back pain: a randomized controlled trial. *Spine* 2007;32(15):1578-85. doi: 10.1097/BRS.0b013e318074f890
28. Lamb SE, Hansen Z, Lall R, et al. Group cognitive behavioural treatment for low-back pain in primary care: a randomised controlled trial and cost-effectiveness analysis. *Lancet* 2010;375(9718):916-23. doi: 10.1016/S0140-6736(09)62164-4
29. Vibe Fersum K, O'Sullivan P, Skouen JS, et al. Efficacy of classification-based cognitive functional therapy in patients with non-specific chronic low back pain: a randomized controlled trial. *Eur J Pain* 2013;17(6):916-28. doi: 10.1002/j.1532-2149.2012.00252.x
30. Hall A, Richmond H, Copsey B, et al. Physiotherapist-delivered cognitive-behavioural interventions are effective for low back pain, but can they be replicated in clinical practice? A systematic review. *Disability and rehabilitation* 2018;40(1):1-9. doi: 10.1080/09638288.2016.1236155 [published Online First: 2016/11/23]
31. van Erp RMA. Back on Track: Chronic Low Back Pain Rehabilitation in Primary Care [PhD thesis]. Maastricht University, 2017.
32. Brage K, Ris I, Falla D, et al. Pain education combined with neck- and aerobic training is more effective at relieving chronic neck pain than pain education alone--A preliminary randomized controlled trial. *Man Ther* 2015;20(5):686-93. doi: 10.1016/j.math.2015.06.003
33. Geneen LJ, Martin DJ, Adams N, et al. Effects of education to facilitate knowledge about chronic pain for adults: a systematic review with meta-analysis. *Syst Rev* 2015;4:132. doi: 10.1186/s13643-015-0120-5

- 1
  - 2
  - 3
  - 4
  - 5
  - 6
  - 7
  - 8
  - 9
  - 10
  - 11
  - 12
  - 13
  - 14
  - 15
  - 16
  - 17
  - 18
  - 19
  - 20
  - 21
  - 22
  - 23
  - 24
  - 25
  - 26
  - 27
  - 28
  - 29
  - 30
  - 31
  - 32
  - 33
  - 34
  - 35
  - 36
  - 37
  - 38
  - 39
  - 40
  - 41
  - 42
  - 43
  - 44
  - 45
  - 46
  - 47
  - 48
  - 49
  - 50
  - 51
  - 52
  - 53
  - 54
  - 55
  - 56
  - 57
  - 58
  - 59
  - 60
34. Louw A, Diener I, Butler DS, et al. The effect of neuroscience education on pain, disability, anxiety, and stress in chronic musculoskeletal pain. *Arch Phys Med Rehabil* 2011;92(12):2041-56. doi: 10.1016/j.apmr.2011.07.198
35. Hayes SC. Acceptance and Commitment Therapy, Relational Frame Theory, and the Third Wave of Behavioral and Cognitive Therapies - Republished Article. *Behav Ther* 2016;47(6):869-85. doi: 10.1016/j.beth.2016.11.006
36. Kamper SJ, Apeldoorn AT, Chiarotto A, et al. Multidisciplinary biopsychosocial rehabilitation for chronic low back pain: Cochrane systematic review and meta-analysis. *BMJ* 2015;350:h444. doi: 10.1136/bmj.h444
37. Lindstrom I, Ohlund C, Eek C, et al. The effect of graded activity on patients with subacute low back pain: a randomized prospective clinical study with an operant-conditioning behavioral approach. *Phys Ther* 1992;72(4):279-90; discussion 91-3.
38. Mansell G, Hall A, Toomey E. Behaviour change and self-management interventions in persistent low back pain. *Best Pract Res Clin Rheumatol* 2016;30(6):994-1002. doi: 10.1016/j.berh.2017.07.004 [published Online First: 2017/11/07]
39. Nicholl BI, Sandal LF, Stochkendahl MJ, et al. Digital Support Interventions for the Self-Management of Low Back Pain: A Systematic Review. *J Med Internet Res* 2017;19(5):e179. doi: 10.2196/jmir.7290 [published Online First: 2017/05/28]
40. Vlaeyen JW, Linton SJ. Fear-avoidance model of chronic musculoskeletal pain: 12 years on. *Pain* 2012;153(6):1144-7. doi: 10.1016/j.pain.2011.12.009 [published Online First: 2012/02/11]
41. Regieraad Kwaliteit van Zorg. Chronische pijn. Den Haag, 2011.
42. Haarsma F, Moser A, Beckers M, et al. The perceived impact of public involvement in palliative care in a provincial palliative care network in the Netherlands: a qualitative study. *Health Expect* 2015;18(6):3186-200. doi: 10.1111/hex.12308
43. Nijkraak MJ, Keus SH, Overeem S, et al. The ParkinsonNet concept: development, implementation and initial experience. *Mov Disord* 2010;25(7):823-9. doi: 10.1002/mds.22813 [published Online First: 2010/05/13]
44. Rosendal H. Comparative cohort studies in transmural care. Utrecht: Utrecht University, 2002.
45. World Health Organization. Rehabilitation in health systems. Geneva 2017.
46. Krug E, Cieza A. Strengthening health systems to provide rehabilitation services. 2017; 95.
47. Berwick DM, Nolan TW, Whittington J. The triple aim: care, health, and cost. *Health Aff* 2008;27(3):759-69. doi: 10.1377/hlthaff.27.3.759
48. Bodenheimer T, Sinsky C. From Triple to Quadruple Aim: Care of the Patient Requires Care of the Provider. *Ann Fam Med* 2014;12(6):573-76. doi: 10.1370/afm.1713
49. Gulliksen J, Göransson B, Boivie I, et al. Key Principles for User-Centred Systems Design. In: Seffah A, Gulliksen J, Desmarais MC, eds. Human-Centered Software Engineering — Integrating Usability in the Software Development Lifecycle. Dordrecht: Springer Netherlands 2005:17-36.
50. Hochstenbach LMJ, Courtens AM, Zwakhalen SMG, et al. Co-creative development of an eHealth nursing intervention: Self-management support for outpatients with cancer pain. *Appl Nurs Res* 2017;36:1-8. doi: <http://dx.doi.org/10.1016/j.apnr.2017.03.004>
51. Craig P, Dieppe P, Macintyre S, et al. Developing and evaluating complex interventions: the new Medical Research Council guidance. *BMJ* 2008;337:a1655. doi: 10.1136/bmj.a1655 [published Online First: 2008/10/01]
52. Damschroder LJ, Aron DC, Keith RE, et al. Fostering implementation of health services research findings into practice: a consolidated framework for advancing implementation science. *Implement Sci* 2009;4 doi: 10.1186/1748-5908-4-50
54. Leung FH, Savithiri R. Spotlight on focus groups. *Can Fam Physician* 2009;55(2):218-9. [published Online First: 2009/02/18]

- 1  
2  
3 55. Sananet Care BV. Sananet: specialist in eHealth [Available from:  
4 <http://www.sananet.nl/ehealth-specialist.html> accessed 09/08/2018.  
5  
6 56. Leemrijse CJ, Swinkels IC, Veenhof C. Direct access to physical therapy in the Netherlands:  
7 results from the first year in community-based physical therapy. *Phys Ther*  
8 2008;88(8):936-46. doi: 10.2522/ptj.20070308 [published Online First: 2008/06/21]  
9  
10 57. Huyse FJ, Lyons JS, Stiefel FC, et al. "INTERMED": a method to assess health service  
11 needs. I. Development and reliability. *Gen Hosp Psychiatry* 1999;21(1):39-48. [published  
12 Online First: 1999/03/09]  
13  
14 58. Stiefel FC, de Jonge P, Huyse FJ, et al. "INTERMED": a method to assess health service  
15 needs. II. Results on its validity and clinical use. *Gen Hosp Psychiatry* 1999;21(1):49-56.  
16 [published Online First: 1999/03/09]  
17  
18 59. Hsieh HF, Shannon SE. Three approaches to qualitative content analysis. *Qual Health Res*  
19 2005;15(9):1277-88. doi: 10.1177/1049732305276687 [published Online First:  
20 2005/10/06]

### Reference Table 1

- 21 53. Werkgroep Pijnrevalidatie Nederland. Medisch Specialistische Revalidatie bij chronische  
22 pijn aan het houdings- en bewegingsapparaat. Position Paper. Utrecht, 2017.  
23  
24  
25

### AUTHORS CONTRIBUTIONS

26  
27  
28 JAMCFV, IPJH, and AJK conceived the original idea and outline of the study, and CL, MEK,  
29 IPJH, JAMCFV, and DR contributed to designing the study. JAMCFV, IPJH, and AJK were  
30 responsible for developing the intervention. CL was the primary writer of the study protocol in  
31 collaboration with MEK and IPJH. All authors discussed and commented on draft versions and  
32 approved the final version.  
33  
34  
35  
36

### FUNDING

37  
38  
39 This work was funded by Health Insurance Companies CZ, VGZ and Achmea, the Netherlands.  
40 The funding bodies had no role in the design of the study or writing the manuscript  
41  
42  
43

### COMPETING INTERESTS

44  
45 CL, MEK and DR have nothing to disclose. AJK, JAMCFV, and IPJH report grants from Health  
46 Insurance Companies CZ, VGZ and Achmea, during the conduct of the study;  
47  
48  
49

### ACKNOWLEDGEMENTS

50  
51  
52 We would like to thank Miriam Tabak, as a representative of the patient organization  
53 Pijnpatiënten naar één stem, for her contribution in the development of the SanaCoach Pain  
54  
55  
56  
57



1  
2  
3 Rehabilitation Limburg and the treatment protocols. Moreover, we would like to thank Mario  
4 Geilen, physician assistant Adelante Centre of Expertise in Rehabilitation and Audiology,  
5 Hoensbroek, The Netherlands, for his contribution in the development of the treatment protocols  
6 and the education of the healthcare professionals.  
7  
8  
9

### 10 11 **ETHICS APPROVAL**

12 Approval from the Medical Ethics Committee Z, the Netherlands, METC 17-N-133.  
13  
14

### 15 16 **OPEN ACCESS**

17 This is an Open Access article distributed in accordance with the Creative Commons Attribution  
18 Non Commercial (CC BY-NC 4.0) license, which permits others to distribute, remix, adapt, build  
19 upon this work non-commercially, and license their derivative works on different terms, provided  
20 the original work is properly cited and the use is non-commercial. See:  
21  
22

23 <http://creativecommons.org/licenses/by-nc/4.0/>  
24  
25  
26  
27  
28

29 **Figure 1 Construction of the health care system in Network Pain Rehabilitation Limburg**  
30  
31

32 **Figure 2 First patient contact and referral options per healthcare setting and discipline. NPRL = Network Pain**  
33 **Rehabilitation Limburg**  
34  
35  
36  
37  
38  
39  
40  
41  
42  
43  
44  
45  
46  
47  
48  
49  
50  
51  
52  
53  
54  
55  
56  
57  
58  
59  
60

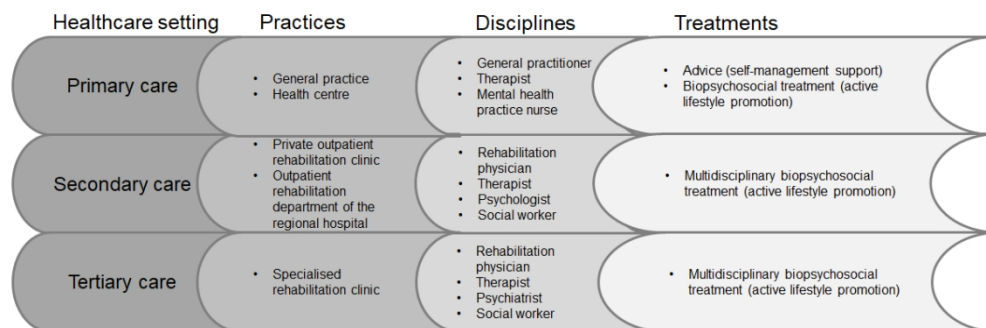

Figure 1 Construction of the health care system in Network Pain Rehabilitation Limburg

102x34mm (300 x 300 DPI)



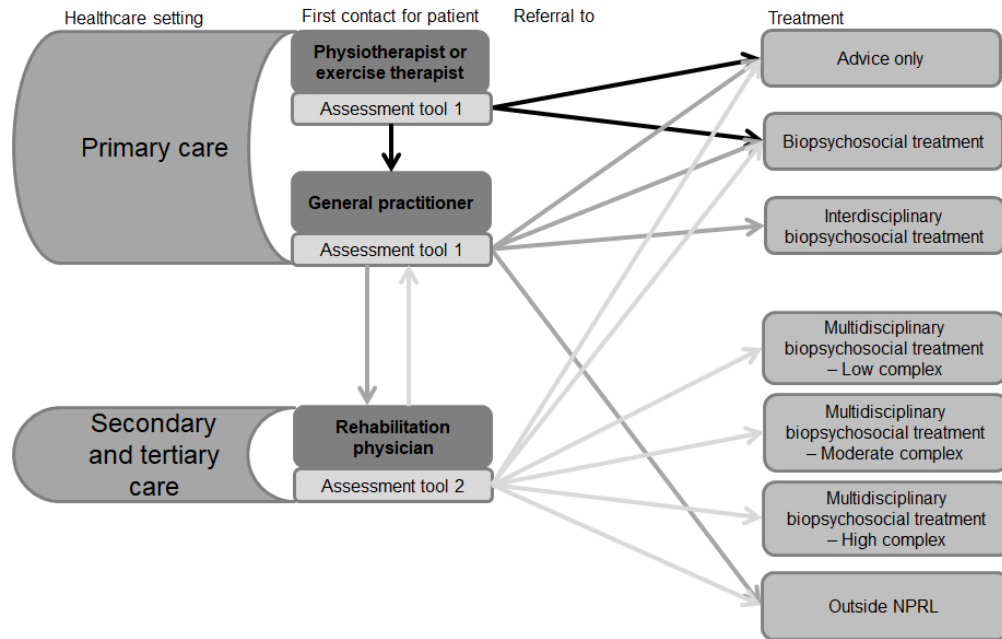

Figure 2 First patient contact and referral options per healthcare setting and discipline. NPRL = Network Pain Rehabilitation Limburg

77x49mm (300 x 300 DPI)

# BMJ Open

## Developing the Network Pain Rehabilitation Limburg: a feasibility study protocol

|                                 |                                                                                                                                                                                                                                                                                                                                                                                                                                                                                                                                                                                                                                                                                                                                                                                                                                      |
|---------------------------------|--------------------------------------------------------------------------------------------------------------------------------------------------------------------------------------------------------------------------------------------------------------------------------------------------------------------------------------------------------------------------------------------------------------------------------------------------------------------------------------------------------------------------------------------------------------------------------------------------------------------------------------------------------------------------------------------------------------------------------------------------------------------------------------------------------------------------------------|
| Journal:                        | <i>BMJ Open</i>                                                                                                                                                                                                                                                                                                                                                                                                                                                                                                                                                                                                                                                                                                                                                                                                                      |
| Manuscript ID                   | bmjopen-2018-025962.R2                                                                                                                                                                                                                                                                                                                                                                                                                                                                                                                                                                                                                                                                                                                                                                                                               |
| Article Type:                   | Protocol                                                                                                                                                                                                                                                                                                                                                                                                                                                                                                                                                                                                                                                                                                                                                                                                                             |
| Date Submitted by the Author:   | 22-May-2019                                                                                                                                                                                                                                                                                                                                                                                                                                                                                                                                                                                                                                                                                                                                                                                                                          |
| Complete List of Authors:       | Lamper, Cynthia; Maastricht University CAPHRI School for Public Health and Primary Care, Department of Rehabilitation Medicine<br>Kroese, Mariëlle; Maastricht University CAPHRI School for Public Health and Primary Care, Department of Health Services Research<br>Köke, Albère; Maastricht University CAPHRI School for Public Health and Primary Care, Department of Rehabilitation Medicine; Adelante<br>Ruwaard, Dirk; Maastricht University CAPHRI School for Public Health and Primary Care, Department of Health Services Research<br>Verbunt, Jeanine; Maastricht University CAPHRI School for Public Health and Primary Care, Department of Rehabilitation Medicine; Adelante<br>Huijnen, Ivan ; Maastricht University CAPHRI School for Public Health and Primary Care, Department of Rehabilitation Medicine; Adelante |
| <b>Primary Subject Heading</b>: | Rehabilitation medicine                                                                                                                                                                                                                                                                                                                                                                                                                                                                                                                                                                                                                                                                                                                                                                                                              |
| Secondary Subject Heading:      | Qualitative research, Patient-centred medicine, Health services research, Evidence based practice                                                                                                                                                                                                                                                                                                                                                                                                                                                                                                                                                                                                                                                                                                                                    |
| Keywords:                       | REHABILITATION MEDICINE, HEALTH SERVICES ADMINISTRATION & MANAGEMENT, Musculoskeletal disorders < ORTHOPAEDIC & TRAUMA SURGERY, PAIN MANAGEMENT, PRIMARY CARE, Organisation of health services < HEALTH SERVICES ADMINISTRATION & MANAGEMENT                                                                                                                                                                                                                                                                                                                                                                                                                                                                                                                                                                                         |
|                                 |                                                                                                                                                                                                                                                                                                                                                                                                                                                                                                                                                                                                                                                                                                                                                                                                                                      |

SCHOLARONE™  
Manuscripts

## Developing the Network Pain Rehabilitation Limburg: a feasibility study protocol

Cynthia Lamper<sup>1</sup>, Mariëlle EAL Kroese<sup>2</sup>, Albère J Köke<sup>1,3</sup>, Dirk Ruwaard<sup>2</sup>, Jeanine AMCF Verbunt<sup>1,3</sup>, Ivan PJ Huijnen<sup>1,3</sup>

### Corresponding author

Cynthia Lamper  
Universiteitssingel 40,  
6229 ER Maastricht  
P.O. Box 616, 6200 MD Maastricht  
the Netherlands  
[cynthia.lamper@maastrichtuniversity.nl](mailto:cynthia.lamper@maastrichtuniversity.nl)  
+31 (0)43-3882168

### Author affiliations

<sup>1</sup>Department of Rehabilitation Medicine, School for Public Health and Primary Care (CAPHRI), Maastricht University, Faculty of Healthcare, Medicine and Life Sciences, Maastricht, the Netherlands

<sup>2</sup>Department of Health Services Research, School for Public Health and Primary Care (CAPHRI), Faculty of Healthcare, Medicine and Life Sciences, Maastricht University, Maastricht, the Netherlands

<sup>3</sup>Centre of Expertise in Rehabilitation and Audiology, Adelante, Hoensbroek, the Netherlands

Word count, excluding title page, abstract, references, figures, and tables: 4238

## ARTICLE SUMMARY

### Abstract

Introduction: Patients having chronic musculoskeletal pain (CMP) face challenges as mismatches often exist between the complexity of patient's pain problem and the rehabilitation treatment offered. This can result in less efficient care for the patient and increased medical shopping. The Network Pain Rehabilitation Limburg (NPRL), a transmural integrated healthcare network, will be designed to improve daily care for patients with CMP. NPRL focusses on improving patient's level of functioning despite pain by stimulating a biopsychosocial approach given by all involved healthcare professionals. A feasibility study will be performed which will give insight into the barriers and facilitators, perceived value, acceptability, and implementation strategies for NPRL.

Methods and analysis: This study has a three-phase iterative and incremental design, based on key principles of an user-centred design. Mixed methods will be used in which healthcare professionals and patients involved in NPRL, will participate. In phase 1, NPRL will be developed and healthcare professionals educated. Phase 2 focusses on the implementation and phase 3 on the transferability of NPRL. In addition, preliminary data on patient's work status, general health, and participation level will be collected. The qualitative results of each phase will be analysed following the Consolidated Framework for Implementation Research (CFIR) and will be used to refine NPRL in daily practise.

Ethics and dissemination: Informed consent will be obtained from all participants. The results of this feasibility study will form the basis for refinement of NPRL and planning of a large-scale process and effect evaluation of the Quadruple Aim outcomes. Dissemination will include publications and presentations at national and international conferences. Ethical approval for this study was granted by the Medical Ethics Committee Z, the Netherlands, METC 17-N-133.

### Keywords

Feasibility, transmural network, integrated care, pain rehabilitation, musculoskeletal pain, Quadruple Aim

### Strengths and limitations of the study

- This study will be the first to evaluate feasibility of a transmural network for pain patient's rehabilitation, which provides integrated care aiming to improve their level of functioning despite pain by stimulating a biopsychosocial approach given by all involved healthcare professionals.
- In an iterative, user-centered design, mixed methods will be used to evaluate the barriers and facilitators, perceived value, acceptability, and implementation strategies for the development, implementation, and transferability.
- Data will be analysed using the Consolidated Framework for Implementation Research by Damschroder et al.
- The evidence generated from this feasibility study will not only help to adjust the design and content of Network Pain Rehabilitation Limburg, but will also help future studies with developing and implementing transmural networks in healthcare.
- Depending on the results of this feasibility study, a large-scale process and effect evaluation on the Quadruple Aim outcomes will be planned.

## INTRODUCTION

Nineteen percent of adults in Europe suffer from moderate to severe chronic pain with a duration of at least 6 months according to a large-scale epidemiological study.<sup>1</sup> Also, about 18% of adults in the Netherlands have moderate to severe general chronic pain.<sup>2</sup> Almost 90% of individuals with chronic pain had experienced it for over 2 years.<sup>3</sup> The most reported chronic pain complaint was chronic musculoskeletal pain (CMP). CMP is a complex biopsychosocial experience that varies widely between people depending on the context and meaning of the pain and the impact of psychosocial factors on patient's functioning.<sup>4 5</sup>

Breivik *et al*<sup>1</sup> found that people with CMP were less able or even unable to do a range of daily activities and to maintain an independent lifestyle. In addition to pain itself, patients with CMP are often confronted with an elevated level of disability, depression, and anxiety resulting in an increased disease burden.<sup>6-8</sup> In addition, work absenteeism among these patients is very high.<sup>1 9</sup>

<sup>10</sup> In recent years, the direct and indirect costs for CMP patients are estimated at 20 billion Euro's in the Netherlands.<sup>11</sup> These costs are even higher than the annual costs of heart disease, cancer, and diabetes.<sup>12</sup> Although costs for CMP are high, only up to 60-74% of patients with CMP get treated, and only 2-5% get treated by a pain management specialist.<sup>1 2 13</sup>

Currently, regardless treatment as received, 34-79% of Dutch CMP patients still indicate a feeling of inadequate treatment.<sup>2 14</sup> These patients seek a diagnosis or solution to their pain problem, which explains medical shopping. Even 61% of patients that started a multidisciplinary rehabilitation program visited 6 to > 20 different healthcare professionals one year before starting with multidisciplinary rehabilitation program.<sup>15</sup> A potential reason for these inefficiencies might be that the complexity of the patient's pain problem does not match with treatment as delivered, resulting in over or under treatment<sup>16</sup>, which highlights the need for adequate (cost) effective treatment strategies.

This mismatch may be explained by the fact that the knowledge and perspective of healthcare professionals, decision makers, and the public varies regarding CMP, referral, and treatment.<sup>13</sup> Healthcare professionals receive inadequate training on the diagnosis and treatment of CMP, causing different points of view.<sup>17</sup> Some healthcare professionals are more biomedical oriented and focus on explaining and solving the pain, whereas others are more biopsychosocial oriented and focus on optimising functioning despite CMP.<sup>18</sup> Therefore, referral and treatment

1  
2  
3 selections vary among healthcare professionals, which may result in less efficient care for  
4 patients with CMP.  
5  
6

7  
8 Besides the different perspectives regarding CMP, general practitioners (GPs) in primary care  
9 and rehabilitation physicians (RPs) in secondary and tertiary care refer patients mostly based on  
10 their anamnesis and clinical experience. However, it appears to be difficult for GPs to identify  
11 the impact of all psychosocial factors on chronic low back pain patients, one of the most  
12 frequently encountered CMP problems.<sup>19</sup> Recently, different tools became available to support  
13 GPs in the decision-making process concerning (initial) treatment options for patients with  
14 chronic low back pain and fibromyalgia, especially focusing on the impact of psychosocial  
15 components.<sup>20-23</sup> However, these decision-making tools are not implemented in daily care yet in  
16 the Netherlands. In the Dutch health care system, patients with moderate to severe levels of  
17 disability and associated influencing psychosocial factors are seen by a RP. To support decision  
18 making by RPs, an evidence-based objective tool to classify patients objectively and  
19 transparently for a specific treatment is needed. Earlier studies have shown that the interrater  
20 reliability of the method currently used by RPs to classify the level of disability (WPN  
21 classification) is at least questionable.<sup>24 25</sup> In addition, healthcare professionals indicate a lack of  
22 overview regarding the complete supply of treatment methods, resulting in inadequate  
23 referrals.<sup>26</sup>  
24  
25  
26  
27  
28  
29  
30  
31  
32  
33

34  
35 Ideally, after assessing the level of disability, the patient receives a treatment matching the  
36 complexity of the pain problem in line with the biopsychosocial profile. As in most situations, no  
37 cure for CMP is possible and evidence-based treatments are multicomponent pain rehabilitation  
38 with a biopsychosocial focus on being active and living a valuable life despite pain.<sup>5 27-29</sup> In  
39 primary care physiotherapy, cognitive-behavioural interventions and interventions focusing on  
40 biopsychosocial factors have shown long-term effects on patient outcomes.<sup>30 31</sup> Moreover, even  
41 positive effects were found when advice combined with pain education alone is given by GPs or  
42 therapists to patients with CMP.<sup>32-34</sup> In secondary and tertiary care, multidisciplinary pain  
43 rehabilitation programs with physical, psychological, and/or social/work related components, like  
44 Acceptance Commitment Therapy (ACT), Graded Activity (GA), and Exposure in vivo (EXP),  
45 are more effective than treatments focusing on one aspect of the biopsychosocial model for  
46 decreasing pain and disability in patients with disabling chronic low back pain.<sup>35-40</sup>  
47  
48  
49  
50  
51  
52  
53  
54  
55  
56  
57  
58  
59  
60



1  
2  
3 Despite this knowledge of the effective components of multidisciplinary rehabilitation programs,  
4 a wide variety of treatment approaches in various dosages are currently applied in regular  
5 rehabilitation programs in different private and public rehabilitation centres.<sup>41</sup> To overcome the  
6 different points of view as well as the lack of overview about treatment options, objective  
7 decision-making tools, and variety of treatments in the Netherlands, a national care standard for  
8 chronic pain was presented in 2017.<sup>11</sup> In this standard, a matched and person-centred care  
9 approach for patients with CMP was proposed.<sup>42</sup>  
10  
11  
12  
13  
14  
15

16 To implement care as part of the national care standard, a transmurals network could be  
17 designed in which different healthcare professionals collaborate in providing person-centred  
18 rehabilitation care. Recently, different transmurals integrated care health networks, for example  
19 for Parkinson's disease and palliative care, have been successfully developed and implemented  
20 in the Netherlands.<sup>43 44</sup> In line with these findings, a transmurals pain rehabilitation network can  
21 provide a shared vision regarding CMP, including early recognition of subacute pain patients  
22 followed by suitable person-centred treatment and referral, is supposed to improve patients'  
23 levels of functioning despite pain and to prevent medical shopping of patients with CMP.<sup>11</sup> It  
24 should have an unambiguous view, matched care, and a person-centred approach with  
25 guidelines for referral and treatment, coordination, and a continuous focus on improvement of  
26 care to increase the effectiveness, quality, and efficiency of healthcare for patients with CMP.<sup>45</sup>  
27 This approach fits with the advice of the World Health Organisation to focus on stimulating  
28 functioning when designing rehabilitation care.<sup>46 47</sup>  
29  
30  
31  
32  
33  
34  
35  
36  
37

38 The Network Pain Rehabilitation Limburg (NPRL), a transmurals healthcare network for CMP  
39 rehabilitation, will be designed to ultimately fulfil the Quadruple Aim in the province of Limburg,  
40 the Netherlands.<sup>48 49</sup> NPRL provides integrated care for patients with CMP in order to improve  
41 their level of functioning despite pain by stimulating a biopsychosocial approach for all involved  
42 healthcare professionals. As a first step a feasibility study will be performed. This study aims to  
43 provide insight into the barriers and facilitators, perceived value, acceptability, and  
44 implementation strategies for the development, implementation, and transferability of the NPRL.  
45 This paper describes the study protocol of the feasibility study of NPRL for adults with CMP.  
46  
47  
48  
49  
50  
51  
52  
53  
54  
55  
56  
57  
58  
59  
60

## METHODS

### Study design

A feasibility study with an iterative and incremental design, based on key principles of user-centred design<sup>50 51</sup> will be conducted in the South-East region of the Netherlands from October 2017 till October 2018. This will follow the UK Medical Research Council framework<sup>52</sup> for developing complex interventions. It will be useful as NPRL is a complex intervention because of the number of practices and integrated healthcare settings targeted in the NPRL and the number and variability of outcomes. In this iterative process, the development of NPRL will take place in three phases, namely development, implementation, and transferability. The results of each phase will be used to refine the elements of the intervention and to shape the next phase, in which the barriers and facilitators of the different phases will be evaluated. During meetings, all healthcare professionals involved will be informed about the results and the adjustments to NPRL. In the subsequent phase, new adjustments will be integrated in daily practise. The development and implementation process will be 'practise-focused', indicating that the development will be based on the healthcare professionals' experiences with the current healthcare situation.

In phase 1, exploration of context will take place in order to develop the design of the NPRL and to educate the healthcare professionals involved. The focus will be on the barriers and facilitators in the development process of NPRL. Next, in phase 2 (implementation), the project focus will be on the specification of the content to adjust the design of the NPRL to daily practise. More insight into the barriers and facilitators of the implementation process will be collected. In phase 3 (transferability), the project will focus on the organisation of care in daily practise and the research focus will be on the barriers and facilitators for further implementation in other practices and organisations. In addition, preliminary data on efficiency will be collected. The qualitative data collected during the study will be analysed using The Consolidated Framework for Implementation Research (CFIR).<sup>53</sup> NPRL will be feasible in daily practise if the studied barriers and facilitators from the perspectives of healthcare professionals and patients are translatable to policies or guidelines that can be adjusted and integrated in daily practise.

## Participants

In this transmural NPRL, healthcare professionals from different disciplines (GPs, physiotherapists, exercise therapists, mental health practice nurses, RPs, and rehabilitation teams) and different healthcare settings (primary, secondary, and tertiary care) will be asked for participation (Figure 1). The setting in primary care concerns general and therapy practices, in secondary care a private outpatient rehabilitation clinic and the outpatient rehabilitation department of a regional hospital, and in tertiary care a specialised rehabilitation clinic. The quality criteria established for practices and organisations for enrolling in NPRL are described in Table 1.

Table 1: Inclusion criteria for healthcare professionals for enrolling in NPRL

| Inclusion                                                                                                                                                                                                                       | Exclusion                                                                                                                            |
|---------------------------------------------------------------------------------------------------------------------------------------------------------------------------------------------------------------------------------|--------------------------------------------------------------------------------------------------------------------------------------|
| Having a practice in the pilot area of NPRL.                                                                                                                                                                                    | A GP who has visited less than 2 out of 3 education days or a therapist who has participated in less than 3 out of 4 education days. |
| Willingness to attend the meetings and to implement the different elements of NPRL.                                                                                                                                             | Are not able to implement the protocols or assessment tool of NPRL in their own practice.                                            |
| GPs and mental health practice nurses must be linked to a participating therapist in order to make effective referrals to treat patients in (interdisciplinary) primary care regarding the protocol and vision of NPRL.         |                                                                                                                                      |
| Physiotherapists having a participating GP or RP. As they cannot refer a patient when the patient is too complex for them, they will not have an inclusion option for study participants if there is no participating GP or RP. |                                                                                                                                      |
| Secondary and tertiary organisations have to meet the criteria of the Position Paper 'Medical Specialist Rehabilitation for chronic musculoskeletal pain' [2017]. <sup>54</sup>                                                 |                                                                                                                                      |
| NPRL = Network Pain Rehabilitation Limburg; GP = general practitioner; RP = rehabilitation physician                                                                                                                            |                                                                                                                                      |

In primary care, the recruitment will start with a primary care therapist or a GP interested in pain, and after consent to participate in NPRL. This person will be asked to recruit a GP or therapist with whom they already have intensive collaboration. For secondary and tertiary care, main organisations in the region providing rehabilitation care for patients with CMP will be asked to participate, so all healthcare settings in this region will be covered. Because of the nature and

aim of this feasibility study, we decided to keep the number of healthcare professionals restricted. Based on earlier research, it has to be expected that in this situation the implementation process in daily practise can be easily adjusted when barriers arise.<sup>44</sup>

In addition to the involvement of healthcare professionals in this study, all patients treated by the participating healthcare professionals will be asked to evaluate NPRL and the perceived quality of care. The inclusion criteria for patients to participate in this study are described in Table 2.

| Inclusion                                                                | Exclusion                                                                                                                                                                                           |
|--------------------------------------------------------------------------|-----------------------------------------------------------------------------------------------------------------------------------------------------------------------------------------------------|
| Age ≥ 18 years old at the start of the study.                            | Any suspicion of a medical (orthopaedic, rheumatic, or neurological) disease that can explain the current pain (e.g. rheumatism or hernia) complaints or that can be treated by sufficient therapy. |
| Patient living in the pilot area (physiotherapist, GP, or RP) of NPRL.   |                                                                                                                                                                                                     |
| Having musculoskeletal pain that is (suspected to be) chronic.           | Any suspicion of a (underlying) psychiatric disease, for which psychiatric treatment is better suited, according to the expert opinion of the GP and RP.                                            |
| Treatment aim of the patient is to improve functioning despite the pain. | Pregnancy.                                                                                                                                                                                          |
| Adequate Dutch literacy to complete the assessments.                     |                                                                                                                                                                                                     |

NPRL = Network Pain Rehabilitation Limburg; GP = general practitioner; RP = rehabilitation physician

It is expected that approximately 100 patients from all participating healthcare settings will give informed consent during the course of this study. They will receive questionnaires regarding satisfaction with care and their health status and pain related disability. Moreover, a sample of approximately 10 patients, who finished a treatment according to the protocol of NPRL, will be recruited for a focus group. In this focus group more information about barriers and facilitators from a patient perspective will be collected. In this way patients are able to react to each other which will illuminate various perspectives which leads to a faster data saturation about each topic, which is an advantage above interviews.<sup>55</sup>

### **Intervention: Network Pain Rehabilitation Limburg**

The main aim of NPRL is to provide integrated care for patients with CMP in order to improve their level of functioning despite pain by stimulating a biopsychosocial approach for all involved

1  
2  
3 healthcare professionals. This should accomplish the Quadruple Aim: improvement of CMP  
4 patient functioning, experiences of care, and work life satisfaction of physicians and staff, as  
5 well as a reduction of healthcare costs of patients with CMP.  
6  
7

8  
9 Each patient will receive the treatment needed to reach his/her optimal level of functioning. In  
10 order to reach this, a matched care approach will be used for every individual patient.  
11 Depending on the level of disability and biopsychosocial factors involved, this will either include;  
12 1) education only and no further treatment, 2) monodisciplinary treatment in primary care, 3)  
13 multidisciplinary treatment in primary care (collaboration between GPs, primary care therapists,  
14 and mental health practice nurses in assessing and treating patients with CMP who need  
15 mental support besides physical exercise), 4) interdisciplinary treatment in secondary or 5)  
16 interdisciplinary treatment in tertiary care. Collaboration will be supported by facilitating  
17 communication between patients and all healthcare professionals involved in the trajectory of an  
18 individual patient by E-health.<sup>56</sup> In addition, the collaboration between healthcare professionals  
19 in different practices and organisations will be further supported by informative meetings and  
20 education days. All healthcare professionals with different specialisms will participate together in  
21 the meetings and education days. This ensures a common understanding of the  
22 biopsychosocial approach and rehabilitation treatment options. In order to facilitate this in daily  
23 practice, the following elements are integrated in NPRL:  
24  
25  
26  
27  
28  
29  
30  
31  
32  
33

### 34 *Integral focus on assessment and referral: assessment tools*

35 To support the healthcare professionals in their decision making for problem mapping and  
36 treatment selection, two evidence-based objective assessment tools will be used. These tools  
37 will support the assessment of the complexity of the pain problem; one tool for GPs and primary  
38 care therapists and one tool for RPs. The assessment tool for primary care is based on the Start  
39 Back Tool<sup>20</sup> and will help to advise patient treatment matched to the patient's biopsychosocial  
40 profile. The options are: advice only, treatments in primary care, or for decision making by a RP  
41 (Figure 2). The GP can also decide to advise patients for a treatment outside NPRL  
42 (psychiatrist, specific healthcare specialist, etc.). Since 2006, patients in the Netherlands can  
43 visit a primary care therapist without a referral of a GP,<sup>57</sup> so these therapists will also use this  
44 assessment tool. In this situation, a primary care therapist of NPRL will advise the patient to visit  
45 the GP for additional assessment and referral if needed as the GP is the gatekeeper to  
46 secondary and tertiary care.  
47  
48  
49  
50  
51  
52  
53  
54  
55  
56  
57  
58  
59  
60

1  
2  
3 When a patient visits a RP, the assessment tool for specialised rehabilitation care is used for  
4 decision making. This tool will assess the patient's view as well as the RP's view of the  
5 biopsychosocial problem and consists of two parts. The first part will guide the anamnesis of the  
6 RP and is based on two different ways to score disability related complexity, namely the Case  
7 Complexity Index and INTERMED method.<sup>25 58 59</sup> First, a standardised scoring method for  
8 assessing the biopsychosocial profile and care for the past and current situations will be used  
9 by the RP. Second, a set of CMP related questionnaires assessing anxiety, depression,  
10 catastrophising, fatigue, pain level, participation level, and general health will be completed by  
11 the patient. After completion of these questionnaires, scores will be interpreted by the RP.  
12 Based on scoring in both parts of the RP-assessment tool, patients will be categorised by  
13 profile, representing the patient's level of disability. In addition to primary and interdisciplinary  
14 primary care, the second tool will assist the RP to further differentiate between available  
15 secondary or tertiary multidisciplinary rehabilitation programs (Figure 2).  
16  
17  
18  
19  
20  
21  
22  
23  
24

#### *Integral focus on treatment content and duration: treatment protocols*

25  
26 When the patient receives treatment, an individualised treatment plan based on their current  
27 needs will be made. The patient decides the treatment aim when he visits a healthcare  
28 professional. In case this is necessary, the practitioner will support the patient in setting  
29 functional goals. Protocols will be based on the most recent evidence-based treatment methods  
30 such as GA, EXP, and ACT<sup>35-38 40</sup> and these will be used in all healthcare settings. As these  
31 evidence-based methods are developed for secondary and tertiary care, they will be adjusted  
32 for primary care. During evaluations in phase 1 and 2, healthcare professionals will be invited to  
33 provide feedback on the treatment protocols. As a result, adjustments to the content and  
34 duration of treatment protocols will be made if these adjustments are in line with the evidence-  
35 based treatment methods.  
36  
37  
38  
39  
40  
41  
42  
43

#### *Integral focus on self-management: E-health application*

44  
45 All professionals and patients participating in the NPRL will make use of an E-health application:  
46 SanaCoach Pain Rehabilitation.<sup>56</sup> Also, primary care patients who receive 'advice only' can  
47 make use of this SanaCoach Pain Rehabilitation. The coach has different functions and goals in  
48 the treatment process. The primary goal is to support self-management. The main function of  
49 the coach is to provide pain education based on the education modules. Different eLearning  
50 modules are developed for the patients in order to teach them about the biopsychosocial  
51 aspects of pain. Furthermore, diaries are integrated into the coach in which patients can give  
52  
53  
54  
55  
56  
57  
58  
59  
60

1  
2  
3 feedback on changes in pain intensity, level of activity over time, and the interrelation between  
4 these variables. Moreover, healthcare professionals can use scores from these diaries to adjust  
5 treatment to individual patients. The coach also consists of a chat function between the patient  
6 and healthcare professionals to ensure short communication lines. All healthcare professionals  
7 involved in the care process of a patient have access to this chat function with that patient.  
8 Additionally, the assessment tool for primary care is integrated, which makes these results  
9 available for all involved healthcare professionals. For this study, the questionnaires for patients  
10 are also available via the coach. Based on the level of complexity of disability, the functions in  
11 the SanaCoach Pain Rehabilitation will be adjusted to the patient, such as the number of diaries  
12 and level of education.  
13  
14  
15  
16  
17  
18  
19

### 20 **Patient and Public Involvement**

21 During the development of the research question, design, recruitment, and conduct of the study  
22 no patients were involved in the process. However, during the development of NPRL itself, a  
23 patient was involved in the development of the SanaCoach Pain Rehabilitation and treatment  
24 protocols. Moreover, the focus of this feasibility study is mainly on healthcare professionals.  
25 They were involved in the development of the treatment protocols, SanaCoach Pain  
26 Rehabilitation and in the development of the different communication strategies between the  
27 healthcare professionals themselves. The results of the study will be disseminated to the study  
28 participants via the webpage ([www.netwerkpijnrevalidatie.nl](http://www.netwerkpijnrevalidatie.nl)) and social media accounts.  
29  
30  
31  
32  
33  
34  
35

### 36 **Data collection**

37 In this study, the feasibility of the development, implementation, and transferability of NPRL for  
38 adults with CMP will be investigated. Therefore, different data collection techniques such as  
39 observations, interviews, focus groups, and questionnaires will be combined to get more insight  
40 into the barriers and facilitators of NPRL (Table 3).  
41  
42  
43  
44  
45

| 47 Phase        | 1                                                                                                                                                                  | 2                                                                                                                    | 3                                                                                                                                            |
|-----------------|--------------------------------------------------------------------------------------------------------------------------------------------------------------------|----------------------------------------------------------------------------------------------------------------------|----------------------------------------------------------------------------------------------------------------------------------------------|
| 48 Time period  | October 2017–February 2018                                                                                                                                         | February 2018–June 2018                                                                                              | June 2018–October 2018                                                                                                                       |
| 49 Goal project | 50 Exploration of context will take<br>51 place in order to develop the<br>52 design of the NPRL and to<br>53 educate the involved healthcare<br>54 professionals. | 55 Specification of the content to<br>56 adjust the design of the<br>57 transmurial network to daily<br>58 practise. | 59 Organisation of care in daily practise<br>60 and barriers and facilitators for<br>implementation in other practices<br>and organisations. |



|                                                                                                                                                                               |                                                   |                                                                                                                                                                                                                                                                                                                                                                                                                                                                                                                                                                                                                                                                                                                                                                      |                                                                                                                                                                                                                                                                                                                                                       |                                                                                                                                                                                                                                                                                                                                                                                                                                                                                                                                                                                                                                                                                                                                                                                                                               |
|-------------------------------------------------------------------------------------------------------------------------------------------------------------------------------|---------------------------------------------------|----------------------------------------------------------------------------------------------------------------------------------------------------------------------------------------------------------------------------------------------------------------------------------------------------------------------------------------------------------------------------------------------------------------------------------------------------------------------------------------------------------------------------------------------------------------------------------------------------------------------------------------------------------------------------------------------------------------------------------------------------------------------|-------------------------------------------------------------------------------------------------------------------------------------------------------------------------------------------------------------------------------------------------------------------------------------------------------------------------------------------------------|-------------------------------------------------------------------------------------------------------------------------------------------------------------------------------------------------------------------------------------------------------------------------------------------------------------------------------------------------------------------------------------------------------------------------------------------------------------------------------------------------------------------------------------------------------------------------------------------------------------------------------------------------------------------------------------------------------------------------------------------------------------------------------------------------------------------------------|
| 1<br>2<br>3<br>4<br>5<br>6                                                                                                                                                    | Goal evaluation                                   | Insight into the barriers and facilitators of the development of NPRL.                                                                                                                                                                                                                                                                                                                                                                                                                                                                                                                                                                                                                                                                                               | Insight into the barriers and facilitators of the implementation of NPRL.                                                                                                                                                                                                                                                                             | Insight into the barriers and facilitators of the transferability of NPRL.                                                                                                                                                                                                                                                                                                                                                                                                                                                                                                                                                                                                                                                                                                                                                    |
| 7<br>8<br>9<br>10<br>11<br>12<br>13<br>14<br>15<br>16<br>17<br>18<br>19<br>20<br>21<br>22<br>23<br>24<br>25<br>26<br>27<br>28<br>29<br>30<br>31<br>32<br>33<br>34<br>35<br>36 | Data collection method, respondents, and outcomes | <p><u>Focus groups and interviews</u></p> <p><i>Healthcare professionals</i></p> <ul style="list-style-type: none"> <li>Experiences with the informative meetings</li> <li>Experiences with the education days</li> <li>Expectations and views on working in NPRL</li> <li>Current experiences (satisfaction) with working in NPRL</li> <li>Barriers and facilitators</li> </ul> <p><u>Questionnaire</u></p> <p><i>Healthcare professionals</i></p> <ul style="list-style-type: none"> <li>Current views and thoughts regarding patients with CMP</li> <li>Referral pattern</li> <li>Patient characteristics</li> </ul>                                                                                                                                              | <p><u>Focus groups and interviews</u></p> <p><i>Healthcare professionals</i></p> <ul style="list-style-type: none"> <li>Views on working in NPRL</li> <li>Current experiences (satisfaction) with working in NPRL</li> <li>Implications and recommendations of the implementation strategy for practise</li> <li>Barriers and facilitators</li> </ul> | <p><u>Focus groups and interviews</u></p> <p><i>Healthcare professionals</i></p> <ul style="list-style-type: none"> <li>Current experiences (satisfaction) with working in NPRL</li> <li>Implications and recommendations of the implementation strategy for practise</li> <li>Implications and recommendations for future research and project</li> <li>Satisfaction with NPRL and with work life</li> <li>Barriers and facilitators</li> </ul> <p><u>Focus group</u></p> <p><i>+/- 10 patients</i></p> <ul style="list-style-type: none"> <li>Perceived quality of care</li> <li>Experiences with NPRL</li> <li>Barriers and facilitators</li> </ul> <p><u>Questionnaire</u></p> <p><i>Healthcare professionals</i></p> <ul style="list-style-type: none"> <li>Referral pattern</li> <li>Patient characteristics</li> </ul> |
| 37<br>38<br>39<br>40<br>41<br>42<br>43<br>44<br>45<br>46<br>47<br>48<br>49<br>50<br>51<br>52<br>53<br>54<br>55<br>56                                                          |                                                   | <p><u>Questionnaire start and end of treatment (T0 and T2)</u></p> <p><i>Patients</i></p> <ul style="list-style-type: none"> <li>Health status</li> <li>Quality of care</li> <li>Usability of the SanaCoach Pain Rehabilitation</li> </ul> <p><u>Questionnaire after referral (T1)</u></p> <p><i>Patients</i></p> <ul style="list-style-type: none"> <li>Quality and satisfaction with referral and care</li> </ul> <p><u>Questionnaire or logbook of treatment</u></p> <p><i>Healthcare specialists</i></p> <ul style="list-style-type: none"> <li>Barriers and facilitators of the treatment protocol per patient</li> </ul> <p><u>Notes</u></p> <ul style="list-style-type: none"> <li>Current views regarding NPRL</li> <li>Barriers and facilitators</li> </ul> |                                                                                                                                                                                                                                                                                                                                                       |                                                                                                                                                                                                                                                                                                                                                                                                                                                                                                                                                                                                                                                                                                                                                                                                                               |

NPRL = Network Pain Rehabilitation Limburg; CMP= chronic musculoskeletal pain

1  
2  
3  
4  
5  
6  
7  
8 During the informative meetings and education days, field notes will be made in order to collect  
9 information about the views on NPRL and its elements out of the perspectives of the healthcare  
10 professionals involved. At the end of each phase, focus groups and/or interviews will take place  
11 with (a selection of) the healthcare professionals involved. During the evaluation of phase 1,  
12 healthcare professionals will be asked about the barriers and facilitators they perceived while  
13 working in NPRL. Therefore, more information will be collected about expectations, views,  
14 experiences, and satisfaction. Also, experiences and opinions about the informative meetings  
15 and education days will be collected. Healthcare professionals will fill in an electronic  
16 questionnaire in phase 1 concerning decision making, treatments, and characteristics of the  
17 patients involved in the study. This information will give more insight into potential changes in  
18 referral policy between the situation in usual care and the situation within NPRL. Moreover, the  
19 questionnaire also asks for knowledge and perspectives regarding patients with CMP.  
20  
21  
22  
23  
24  
25  
26  
27

28 In phases 2 and 3, more emphasis will be put on the added value of NPRL including barriers  
29 and facilitators for implementation. This information will be used for recommendations for  
30 practise and future research. Also in these phases, information will be gained about the  
31 experiences and satisfaction with NPRL during a focus group with healthcare professionals.  
32 Moreover, in phase 3 (transferability), they will fill in an electronic questionnaire concerning  
33 decision making, treatments, and characteristics of the patients involved in the study. As part of  
34 the evaluation of phase 3, a focus group with a sample of 6 to 10 patients with CMP who are  
35 being treated by participating healthcare professionals will take place. During this focus group,  
36 the emphasis will be on the satisfaction of care and experiences, leading to barriers and  
37 facilitators with NPRL.  
38  
39  
40  
41  
42  
43  
44

45 Besides this information, the research team will keep up a logbook to get insight into the barriers  
46 and facilitators of NPRL. The field notes in this logbook will be the results of discussions with  
47 different healthcare professionals, patients, and stakeholders, as well as researchers.

48 Additionally, patients will be asked to complete study-related questionnaires about the quality  
49 and their satisfaction with the decision making, treatment and education, and usability of the  
50 SanaCoach Pain Rehabilitation in order to further improve different elements of NPRL. Besides  
51 this feasibility data, also some questions about their work status, general health, and  
52  
53  
54  
55  
56  
57  
58  
59  
60

1  
2  
3 participation level will be asked as preliminary data on efficiency to objectify the progress of the  
4 treatment. They will receive this questionnaire at the start of the treatment (T0) and at the end of  
5 the treatment (T2). Patients referred to another healthcare professional will receive an extra  
6 questionnaire after the referral (T1) regarding the quality of and satisfaction with the decision  
7 making. Additionally, after completion of the treatment, a small questionnaire or logbook about  
8 the treatment of each patient separately must be handed in by the healthcare professionals.  
9 This information will be used to discover barriers and facilitators and desired adjustments of the  
10 treatment protocols.  
11  
12  
13  
14  
15

### 16 17 **Data Analysis**

18 In this iterative design with key principles of user-centered design, the results will be gathered in  
19 daily practice from the healthcare professional and patient perspective. The results of each  
20 phase will be used to adapt the intervention for the next phase. The Consolidated Framework  
21 for Implementation Research (CFIR) protocol according to Damschroder *et al*<sup>53</sup> will be used to  
22 develop this feasibility evaluation and analysis plan of the results. This explanatory framework  
23 with theory-based constructs and mechanisms will be used to explain whether an  
24 implementation may or may not succeed and to identify barriers and facilitators.  
25  
26  
27  
28  
29  
30

31 All field notes and logbooks will be collected. Additionally, the focus groups and interviews will  
32 be audio recorded and transcribed verbatim. Qualitative data will be analysed using the NVivo  
33 software (NVivo.version 11.1.0.411) following a directed content analysis method.<sup>60</sup> The  
34 analysis will be deductive (e.g. the identified themes will derive from existing theory). After  
35 familiarisation with the data, definitions for the CFIR constructs will be made based on the  
36 intervention in collaboration with the project team. Next, the different constructs will be assigned  
37 to the fewest codes possible. After developing analytic summaries and matrices, the data will be  
38 compared to derive barriers and facilitators. A researcher with expertise in qualitative research  
39 without any involvement in the project will peer review the analysis by verification of the analysis  
40 of 20% of the interviews and focus groups. Also, a cross-check for interim findings with  
41 respondents will be performed.  
42  
43  
44  
45  
46  
47  
48  
49

50 Quantitative data will be analysed concurrently with the qualitative data. Descriptive statistics  
51 will be denoted as mean (standard deviation) or median (range) and number (%) for continuous  
52 and categorical data, respectively, with the use of IBM SPSS Statistics 24.  
53  
54  
55  
56  
57  
58  
59  
60

## ETHICS AND DISSEMINATION

Informed consent will be obtained from all participants. Ethical approval for this study was granted by the Medical Ethics Committee Z, the Netherlands, METC 17-N-133. The results of this feasibility study will form the base for refinement of NPRL and planning of a large-scale process and effect evaluation on the Quadruple Aim outcomes. Dissemination will include publications and presentations at national and international conferences.

## DISCUSSION

This study will provide insight into the feasibility of NPRL, a transmural integrated healthcare network for CMP rehabilitation. The aim is to provide integrated care for patients with CMP in order to improve their level of functioning despite pain by stimulating a biopsychosocial approach for all involved healthcare professionals. It is expected that the study will provide information on barriers and facilitators, perceived value, acceptability, and implementation strategies for the development, implementation, and transferability for further develop and refinement of the NPRL. If the study results suggest that NPRL is feasible and preliminary outcomes are positive, a large-scale process and effective evaluation of the Quadruple Aim outcomes will be performed.

The process of developing NPRL is in accordance with the Medical Research Council guidance on how to develop and evaluate complex interventions.<sup>52</sup> In the development process, existing evidence together with collected evidence based on the expertise of healthcare professionals was combined to develop the first version of NPRL. This first version of NPRL will be implemented on a restricted scale to test the feasibility. The evidence generated from this feasibility study will not only help to adjust the design and content of NPRL but will also inform future methodological studies on developing and implementing a transmural network in healthcare. It is expected that this bottom-up development in combination with the limited number of participating healthcare professionals will lead to a successful implementation of the network. Nijkrake *et al*<sup>44</sup> did indicate this approach as one of the success factors of ParkinsonNet, a successful and cost-effective network in the Netherlands for patients with Parkinson's disease.

In conclusion, there is need for a transmural network in which different healthcare professionals collaborate in providing integrated healthcare for patients with CMP. The aim of NPRL is to improve the level of functioning of individual patients despite pain, experience of care by

patients, and work-life satisfaction for physicians and staff, as well as a reduction in costs. Therefore, this feasibility study will be conducted to explore the barriers and facilitators of the development, implementation, and transferability of NPRL. The results will be applied to refine a large-scale process and effective evaluation of the Quadruple Aim outcomes.

## REFERENCES

1. Breivik H, Collett B, Ventafridda V, et al. Survey of chronic pain in Europe: prevalence, impact on daily life, and treatment. *Eur J Pain* 2006;10(4):287-333. doi: 10.1016/j.ejpain.2005.06.009
2. Bekkering GE, Bala MM, Reid K, et al. Epidemiology of chronic pain and its treatment in The Netherlands. *Neth J Med* 2011;69(3):141-53.
3. Breivik H, Eisenberg E, O'Brien T, et al. The individual and societal burden of chronic pain in Europe: the case for strategic prioritisation and action to improve knowledge and availability of appropriate care. *BMC Public Health* 2013;13:1229. doi: 10.1186/1471-2458-13-1229
4. Bushnell MC, Ceko M, Low LA. Cognitive and emotional control of pain and its disruption in chronic pain. *Nat Rev Neurosci* 2013;14(7):502-11. doi: 10.1038/nrn3516
5. Gatchel RJ, Peng YB, Peters ML, et al. The biopsychosocial approach to chronic pain: scientific advances and future directions. *Psychol Bull* 2007;133(4):581-624. doi: 10.1037/0033-2909.133.4.581
6. Bair MJ, Robinson RL, Katon W, et al. Depression and pain comorbidity: a literature review. *Arch Intern Med* 2003;163(20):2433-45. doi: 10.1001/archinte.163.20.2433 [published Online First: 2003/11/12]
7. Jackson T, Wang Y, Wang Y, et al. Self-efficacy and chronic pain outcomes: a meta-analytic review. *J Pain* 2014;15(8):800-14. doi: 10.1016/j.jpain.2014.05.002
8. Lerman SF, Rudich Z, Brill S, et al. Longitudinal associations between depression, anxiety, pain, and pain-related disability in chronic pain patients. *Psychosom Med* 2015;77(3):333-41. doi: 10.1097/PSY.0000000000000158
9. Borghouts J, Janssen H, Koes B, et al. The management of chronic neck pain in general practice. A retrospective study. *Scand J Prim Health Care* 1999;17(4):215-20.
10. Huisstede BM, Wijnhoven HA, Bierma-Zeinstra SM, et al. Prevalence and characteristics of complaints of the arm, neck, and/or shoulder (CANS) in the open population. *Clin J Pain* 2008;24(3):253-9. doi: 10.1097/AJP.0b013e318160a8b4
11. Zorgstandaard Chronische Pijn 2017 [Available from: [http://www.dutchpainsociety.nl/files/ZorgStandaard\\_Chronische\\_Pijn\\_versie\\_2017\\_03\\_28.pdf](http://www.dutchpainsociety.nl/files/ZorgStandaard_Chronische_Pijn_versie_2017_03_28.pdf) accessed 23/07/2018.
12. Rijksinstituut voor Volksgezondheid en Milieu. 2018 [Available from: <https://www.volksgezondheidenzorg.info/> accessed 19/07/2018.
13. Niv D, Devor M, European Federation of IC. Position paper of the European Federation of IASP Chapters (EFIC) on the subject of pain management. *Eur J Pain* 2007;11(5):487-9. doi: 10.1016/j.ejpain.2007.03.005 [published Online First: 2007/04/17]
14. Krol M, de Boer D, Plass A, et al. CQ-index module Pijn: meetinstrumentontwikkeling. Utrecht: NIVEL 2013.
15. Koke AJ, Smeets RJ, Schreurs KM, et al. Dutch Dataset Pain Rehabilitation in daily practice: Content, patient characteristics and reference data. *Eur J Pain* 2017;21(3):434-44. doi: 10.1002/ejp.937 [published Online First: 2016/09/17]

16. Peerenboom PBG, Spek J. Medisch Specialistische Revalidatie; Aanspraak en praktijk. Elst, The Netherlands: Tangram Zorgadviseurs, 2013.
17. Committee on Education of the EFIC (European Federation of IASP Chapters). The Pain Management Core Curriculum for European Medical Schools, 2013:33.
18. Froud R, Patterson S, Eldridge S, et al. A systematic review and meta-synthesis of the impact of low back pain on people's lives. *BMC Musculoskelet Disord* 2014;15:50. doi: 10.1186/1471-2474-15-50
19. Jellema P, van der Windt DA, van der Horst HE, et al. Why is a treatment aimed at psychosocial factors not effective in patients with (sub)acute low back pain? *Pain* 2005;118(3):350-9. doi: 10.1016/j.pain.2005.09.002
20. Hill JC, Dunn KM, Lewis M, et al. A primary care back pain screening tool: identifying patient subgroups for initial treatment. *Arthritis Rheum* 2008;59(5):632-41. doi: 10.1002/art.23563 [published Online First: 2008/04/29]
21. Hill JC, Whitehurst DG, Lewis M, et al. Comparison of stratified primary care management for low back pain with current best practice (STarT Back): a randomised controlled trial. *Lancet* 2011;378(9802):1560-71. doi: 10.1016/s0140-6736(11)60937-9 [published Online First: 2011/10/04]
22. Linton SJ, Boersma K. Early identification of patients at risk of developing a persistent back problem: the predictive validity of the Orebro Musculoskeletal Pain Questionnaire. *Clin J Pain* 2003;19(2):80-6. [published Online First: 2003/03/05]
23. van Eijk-Hustings Y, Kroese M, Bessems-Beks M, et al. Supporting healthcare professionals systematically to improve the quality and person-centeredness of fibromyalgia management in primary healthcare. *2012* 2012;2(4):8. doi: 10.5750/ijpcm.v2i4.297 [published Online First: 2012-12-06]
24. Boonstra AM, Schiphorst Preuper HR, Brouwer M, et al. Classificatie van patiënten met chronische pijnklachten; onderzoek naar de betrouwbaarheid van de WPN niveaus. *Nederlandstalig Tijdschrift Pijnbestrijding* 2011; 30(46).
25. Waterschoot FP, Bennen E, van der Woude LH, et al. Case complexity in patients with chronic nonspecific musculoskeletal pain: a Delphi and feasibility study. *Int J Rehabil Res* 2016;39(1):48-56. doi: 10.1097/MRR.0000000000000144
26. van Tulder M, Becker A, Bekkering T, et al. Chapter 3. European guidelines for the management of acute nonspecific low back pain in primary care. *Eur Spine J* 2006;15 Suppl 2:S169-91. doi: 10.1007/s00586-006-1071-2
27. Johnson RE, Jones GT, Wiles NJ, et al. Active exercise, education, and cognitive behavioral therapy for persistent disabling low back pain: a randomized controlled trial. *Spine* 2007;32(15):1578-85. doi: 10.1097/BRS.0b013e318074f890
28. Lamb SE, Hansen Z, Lall R, et al. Group cognitive behavioural treatment for low-back pain in primary care: a randomised controlled trial and cost-effectiveness analysis. *Lancet* 2010;375(9718):916-23. doi: 10.1016/S0140-6736(09)62164-4
29. Vibe Fersum K, O'Sullivan P, Skouen JS, et al. Efficacy of classification-based cognitive functional therapy in patients with non-specific chronic low back pain: a randomized controlled trial. *Eur J Pain* 2013;17(6):916-28. doi: 10.1002/j.1532-2149.2012.00252.x
30. Hall A, Richmond H, Copey B, et al. Physiotherapist-delivered cognitive-behavioural interventions are effective for low back pain, but can they be replicated in clinical practice? A systematic review. *Disability and rehabilitation* 2018;40(1):1-9. doi: 10.1080/09638288.2016.1236155 [published Online First: 2016/11/23]
31. van Erp RMA. Back on Track: Chronic Low Back Pain Rehabilitation in Primary Care [PhD thesis]. Maastricht University, 2017.
32. Brage K, Ris I, Falla D, et al. Pain education combined with neck- and aerobic training is more effective at relieving chronic neck pain than pain education alone--A preliminary



- 1  
2  
3 randomized controlled trial. *Man Ther* 2015;20(5):686-93. doi:  
4 10.1016/j.math.2015.06.003
- 5 33. Geneen LJ, Martin DJ, Adams N, et al. Effects of education to facilitate knowledge about  
6 chronic pain for adults: a systematic review with meta-analysis. *Syst Rev* 2015;4:132.  
7 doi: 10.1186/s13643-015-0120-5
- 8 34. Louw A, Diener I, Butler DS, et al. The effect of neuroscience education on pain, disability,  
9 anxiety, and stress in chronic musculoskeletal pain. *Arch Phys Med Rehabil*  
10 2011;92(12):2041-56. doi: 10.1016/j.apmr.2011.07.198
- 11 35. Hayes SC. Acceptance and Commitment Therapy, Relational Frame Theory, and the Third  
12 Wave of Behavioral and Cognitive Therapies - Republished Article. *Behav Ther*  
13 2016;47(6):869-85. doi: 10.1016/j.beth.2016.11.006
- 14 36. Kamper SJ, Apeldoorn AT, Chiarotto A, et al. Multidisciplinary biopsychosocial rehabilitation  
15 for chronic low back pain: Cochrane systematic review and meta-analysis. *BMJ*  
16 2015;350:h444. doi: 10.1136/bmj.h444
- 17 37. Lindstrom I, Ohlund C, Eek C, et al. The effect of graded activity on patients with subacute  
18 low back pain: a randomized prospective clinical study with an operant-conditioning  
19 behavioral approach. *Phys Ther* 1992;72(4):279-90; discussion 91-3.
- 20 38. Mansell G, Hall A, Toomey E. Behaviour change and self-management interventions in  
21 persistent low back pain. *Best Pract Res Clin Rheumatol* 2016;30(6):994-1002. doi:  
22 10.1016/j.berh.2017.07.004 [published Online First: 2017/11/07]
- 23 39. Nicholl BI, Sandal LF, Stochkendahl MJ, et al. Digital Support Interventions for the Self-  
24 Management of Low Back Pain: A Systematic Review. *J Med Internet Res*  
25 2017;19(5):e179. doi: 10.2196/jmir.7290 [published Online First: 2017/05/28]
- 26 40. Vlaeyen JW, Linton SJ. Fear-avoidance model of chronic musculoskeletal pain: 12 years on.  
27 *Pain* 2012;153(6):1144-7. doi: 10.1016/j.pain.2011.12.009 [published Online First:  
28 2012/02/11]
- 29 41. Regieraad Kwaliteit van Zorg. Chronische pijn. Den Haag, 2011.
- 30 42. Linton SJ, Nicholas M, Shaw W. Why wait to address high-risk cases of acute low back  
31 pain? A comparison of stepped, stratified, and matched care. *Pain* 2018;159(12):2437-  
32 41. doi: 10.1097/j.pain.0000000000001308 [published Online First: 2018/06/16]
- 33 43. Haarsma F, Moser A, Beckers M, et al. The perceived impact of public involvement in  
34 palliative care in a provincial palliative care network in the Netherlands: a qualitative  
35 study. *Health Expect* 2015;18(6):3186-200. doi: 10.1111/hex.12308
- 36 44. Nijkrake MJ, Keus SH, Overeem S, et al. The ParkinsonNet concept: development,  
37 implementation and initial experience. *Mov Disord* 2010;25(7):823-9. doi:  
38 10.1002/mds.22813 [published Online First: 2010/05/13]
- 39 45. Rosendal H. Comparative cohort studies in transmural care. Utrecht: Utrecht University,  
40 2002.
- 41 46. World Health Organization. Rehabilitation in health systems. Geneva 2017.
- 42 47. Krug E, Cieza A. Strengthening health systems to provide rehabilitation services. 2017; 95.
- 43 48. Berwick DM, Nolan TW, Whittington J. The triple aim: care, health, and cost. *Health Aff*  
44 2008;27(3):759-69. doi: 10.1377/hlthaff.27.3.759
- 45 49. Bodenheimer T, Sinsky C. From Triple to Quadruple Aim: Care of the Patient Requires Care  
46 of the Provider. *Ann Fam Med* 2014;12(6):573-76. doi: 10.1370/afm.1713
- 47 50. Gulliksen J, Göransson B, Boivie I, et al. Key Principles for User-Centred Systems Design.  
48 In: Seffah A, Gulliksen J, Desmarais MC, eds. Human-Centered Software Engineering  
49 — Integrating Usability in the Software Development Lifecycle. Dordrecht: Springer  
50 Netherlands 2005:17-36.
- 51 51. Hochstenbach LMJ, Courtens AM, Zwakhalen SMG, et al. Co-creative development of an  
52 eHealth nursing intervention: Self-management support for outpatients with cancer pain.  
53 *Appl Nurs Res* 2017;36:1-8. doi: <http://dx.doi.org/10.1016/j.apnr.2017.03.004>
- 54  
55  
56  
57  
58  
59  
60



- 1  
2  
3 52. Craig P, Dieppe P, Macintyre S, et al. Developing and evaluating complex interventions: the  
4 new Medical Research Council guidance. *BMJ* 2008;337:a1655. doi: 10.1136/bmj.a1655  
5 [published Online First: 2008/10/01]  
6  
7 53. Damschroder LJ, Aron DC, Keith RE, et al. Fostering implementation of health services  
8 research findings into practice: a consolidated framework for advancing implementation  
9 science. *Implement Sci* 2009;4 doi: 10.1186/1748-5908-4-50  
10  
11 55. Leung FH, Savithiri R. Spotlight on focus groups. *Can Fam Physician* 2009;55(2):218-9.  
12 [published Online First: 2009/02/18]  
13  
14 56. Sananet Care BV. Sananet: specialist in eHealth [Available from:  
15 <http://www.sananet.nl/ehealth-specialist.html> accessed 09/08/2018.  
16  
17 57. Leemrijse CJ, Swinkels IC, Veenhof C. Direct access to physical therapy in the Netherlands:  
18 results from the first year in community-based physical therapy. *Phys Ther*  
19 2008;88(8):936-46. doi: 10.2522/ptj.20070308 [published Online First: 2008/06/21]  
20  
21 58. Huyse FJ, Lyons JS, Stiefel FC, et al. "INTERMED": a method to assess health service  
22 needs. I. Development and reliability. *Gen Hosp Psychiatry* 1999;21(1):39-48. [published  
23 Online First: 1999/03/09]  
24  
25 59. Stiefel FC, de Jonge P, Huyse FJ, et al. "INTERMED": a method to assess health service  
26 needs. II. Results on its validity and clinical use. *Gen Hosp Psychiatry* 1999;21(1):49-56.  
27 [published Online First: 1999/03/09]  
28  
29 60. Hsieh HF, Shannon SE. Three approaches to qualitative content analysis. *Qual Health Res*  
30 2005;15(9):1277-88. doi: 10.1177/1049732305276687 [published Online First:  
31 2005/10/06]  
32  
33  
34

### Reference Table 1

- 35  
36 54. Werkgroep Pijnrevalidatie Nederland. Medisch Specialistische Revalidatie bij chronische  
37 pijn aan het houdings- en bewegingsapparaat. Position Paper. Utrecht, 2017.  
38  
39  
40  
41  
42  
43  
44  
45

### AUTHORS CONTRIBUTIONS

36  
37 JAMCFV, IPJH, and AJK conceived the original idea and outline of the study, and CL, MEK,  
38 IPJH, JAMCFV, and DR contributed to designing the study. JAMCFV, IPJH, and AJK were  
39 responsible for developing the intervention. CL was the primary writer of the study protocol in  
40 collaboration with MEK and IPJH. All authors discussed and commented on draft versions and  
41 approved the final version.  
42  
43  
44  
45

### FUNDING

46  
47 This work was funded by Health Insurance Companies CZ, VGZ and Achmea, the Netherlands.  
48 The funding bodies had no role in the design of the study or writing the manuscript  
49  
50  
51

### COMPETING INTERESTS

52  
53 CL, MEK and DR have nothing to disclose. AJK, JAMCFV, and IPJH report grants from Health  
54 Insurance Companies CZ, VGZ and Achmea, during the conduct of the study;  
55  
56  
57  
58  
59  
60

## ACKNOWLEDGEMENTS

We would like to thank Miriam Tabak, as a representative of the patient organization Pijnpatiënten naar één stem, for her contribution in the development of the SanaCoach Pain Rehabilitation Limburg and the treatment protocols. Moreover, we would like to thank Mario Geilen, physician assistant Adelante Centre of Expertise in Rehabilitation and Audiology, Hoensbroek, The Netherlands, for his contribution in the development of the treatment protocols and the education of the healthcare professionals.

## ETHICS APPROVAL

Approval from the Medical Ethics Committee Z, the Netherlands, METC 17-N-133.

## OPEN ACCESS

This is an Open Access article distributed in accordance with the Creative Commons Attribution Non Commercial (CC BY-NC 4.0) license, which permits others to distribute, remix, adapt, build upon this work non-commercially, and license their derivative works on different terms, provided the original work is properly cited and the use is non-commercial. See: <http://creativecommons.org/licenses/by-nc/4.0/>

**Figure 1 Construction of the health care system in Network Pain Rehabilitation Limburg**

**Figure 2 First patient contact and referral options per healthcare setting and discipline. NPRL = Network Pain Rehabilitation Limburg**

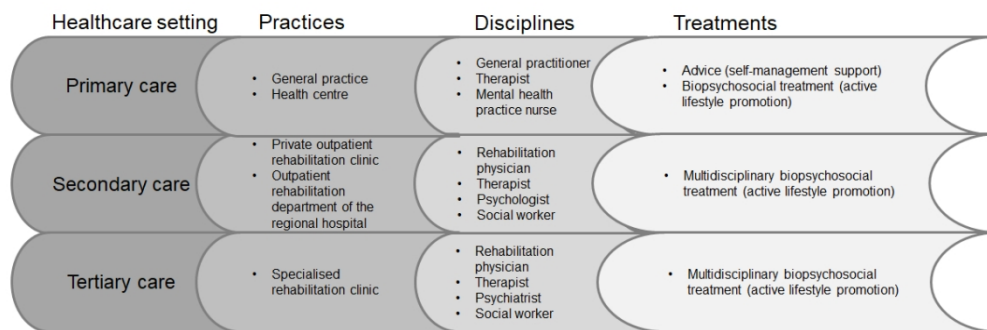

Figure 1 Construction of the health care system in Network Pain Rehabilitation Limburg

102x34mm (300 x 300 DPI)



Figure 2 First patient contact and referral options per healthcare setting and discipline. NPRL = Network Pain Rehabilitation Limburg

77x49mm (300 x 300 DPI)
